1 **The spatial transcriptomic landscape of the healing intestine following damage**

2

3 Sara M. Parigi<sup>1,2,\*</sup>, Ludvig Larsson<sup>3,\*</sup>, Srustidhar Das<sup>1,2</sup>, Ricardo O. Ramirez Flores<sup>4</sup>, Annika  
4 Frede<sup>1,2</sup>, Kumar P. Tripathi<sup>1,2</sup>, Oscar E. Diaz<sup>1,2</sup>, Katja Selin<sup>1,2</sup>, Rodrigo A. Morales<sup>1,2</sup>, Xinxin  
5 Luo<sup>1,2</sup>, Gustavo Monasterio<sup>1,2</sup>, Camilla Engblom<sup>5</sup>, Nicola Gagliani<sup>1,2,6</sup>, Julio Saez-Rodriguez<sup>4</sup>,  
6 Joakim Lundeberg<sup>3</sup> and Eduardo J. Villablanca<sup>1,2,&,#</sup>

7

8

9 <sup>1</sup> Division of Immunology and Allergy, Department of Medicine Solna, Karolinska Institute and  
10 University Hospital, Stockholm, Sweden

11 <sup>2</sup> Center of Molecular Medicine, Stockholm, Sweden

12 <sup>3</sup> Science for Life Laboratory, Department of Gene Technology, KTH Royal Institute of  
13 Technology, Stockholm, Sweden

14 <sup>4</sup> Heidelberg University, Faculty of Medicine, and Heidelberg University Hospital, Institute for  
15 Computational Biomedicine, Bioquant, Heidelberg, Germany

16 <sup>5</sup> Department of Cell and Molecular Biology, Karolinska Institute, Stockholm, Sweden

17 <sup>6</sup> I. Department of Medicine and Department of General, Visceral and Thoracic Surgery,  
18 University Medical Center Hamburg-Eppendorf, Hamburg, Germany

19

20

21 \*These authors contributed equally to this work

22 & Lead contact

23 # Correspondence should be addressed to E.J.V. ([eduardo.villablanca@ki.se](mailto:eduardo.villablanca@ki.se)).

24 **Abstract**

25 The intestinal barrier is composed of a complex cell network defining highly compartmentalized  
26 and specialized structures. Here, we use spatial transcriptomics (ST) to define how the  
27 transcriptomic landscape is spatially organized in the steady state and healing murine colon. At  
28 steady state conditions, we demonstrate a previously unappreciated molecular regionalization of  
29 the colon, which dramatically changes during mucosal healing. Here, we identified spatially-  
30 organized transcriptional programs defining compartmentalized mucosal healing, and regions  
31 with dominant wired pathways. Furthermore, we showed that decreased p53 activation defined  
32 areas with increased presence of proliferating epithelial stem cells. Finally, we used our  
33 resource to map transcriptomics modules associated with human diseases demonstrating that  
34 ST can be used to inform clinical practice. Overall, we provide a publicly available resource  
35 defining principles of transcriptomic regionalization of the colon during mucosal healing and a  
36 framework to develop and progress further hypotheses.

37

38 **Keywords:** Spatial transcriptomics, mucosal healing, colon

## 39 Introduction

40

41 The intestine is divided into the small and large bowels that together host the highest density of  
42 commensal microbiota, which in turn is spatially heterogeneous across the proximal-distal axis  
43 <sup>1</sup>. The geographically heterogeneous microbial exposure has contributed to the establishment of  
44 a highly compartmentalized organ that has distinct functions depending on the proximal-distal  
45 location <sup>2,3</sup>. For example, vitamin A-metabolizing enzymes and consequently retinoic acid  
46 production and function are higher in the proximal compared to distal small intestine <sup>4</sup>,  
47 generating a proximal-to-distal gradient. Although it is broadly accepted that the small intestine  
48 is highly compartmentalized, whether a clear molecular regionalization exists in the colon is yet  
49 to be determined.

50

51 The intestine relies on the constant regeneration of the intestinal epithelium to maintain  
52 homeostasis. Breakdown in regenerative pathways may lead to pathogen translocation and the  
53 development of chronic intestinal pathologies, such as inflammatory bowel disease (IBD) <sup>5</sup>.  
54 Therefore, the intestinal barrier must quickly adapt to promote tissue regeneration and healing  
55 following injury. However, the cellular and molecular circuitry at steady state conditions and how  
56 it adapts upon challenge is yet to be fully characterized.

57 The intestine offers a unique opportunity to investigate common principles of tissue repair at the  
58 barrier because of its spatial organization, which is fundamental to its function. When intestinal  
59 barrier injury occurs, damaged epithelial cells are shed and replaced by mobilizing intestinal  
60 stem cell (ISC)-derived cells <sup>6</sup>, a phenomenon highly dependent on signals coming from the  
61 neighboring microenvironment (niche) <sup>7</sup>. Similarly, immune cells are recruited or expanded *in*  
62 *situ* to protect the host from invading pathogens and to orchestrate the healing process by  
63 providing resolving signals <sup>8</sup>. Although initially considered as a mere structural support, stromal  
64 cells, which includes fibroblasts, endothelial/lymphatic cells, pericytes and glial cells, are also  
65 actively involved in barrier healing through tissue remodeling, matrix deposition,  
66 neoangiogenesis, muscle contraction, and production of pro-regenerative signals <sup>9</sup>. Therefore,  
67 immune, epithelial and stromal cells must quickly adapt within a defined microenvironment and  
68 establish a molecular network to promote tissue repair. However, whether different segments of  
69 the intestine and their microenvironments possess distinct types of tissue repair mechanisms is  
70 currently unknown.

71 Our previous study unveiled the temporal transcriptomic dynamic of the colonic tissue over the  
72 course of dextran sodium sulphate (DSS) colitis, identifying genes and pathways differentially

73 modulated during acute injury or regeneration<sup>10</sup>. Although bulk or single cell RNA sequencing  
74 studies provide unbiased transcriptome analysis, the spatial context within the tissue is typically  
75 lost. In contrast, targeted technologies for spatial gene expression analysis (e.g. in situ RNA-  
76 sequencing, fluorescence in situ hybridization [FISH], RNA-scope) require knowledge of specific  
77 candidate genes to interrogate and thus do not allow an unsupervised investigation of pathways  
78 enriched in healing areas.

79 To overcome these limitations, we exploited spatial transcriptomics (ST), an unbiased  
80 technology allowing sequencing of polyadenylated transcripts from a tissue section, which can  
81 be spatially mapped onto the histological brightfield image<sup>11</sup>. ST allowed us to uncover an  
82 unprecedented view of the molecular regionalization of the murine colon, which was further  
83 validated on human intestinal specimens. By comparing ST of colonic tissue under steady state  
84 and upon mucosal healing (i.e. from DSS-treated mice), we identified and spatially mapped  
85 transcriptional signatures of tissue repair processes, immune cell activation/recruitment, pro-  
86 regenerative pathways, and tissue remodeling. The spatial landscape of pathway activity during  
87 mucosal healing also unveiled a negative correlation between p53 activity and proliferating  
88 epithelial stem cells. Moreover, targeted mapping of genes associated with disease outcome in  
89 human IBD patients and IBD risk variants identified from genome-wide association studies  
90 (GWAS) allowed us to infer their involvement in specific pathological processes based on their  
91 localization in areas with distinct histological properties.

92

## 93 **Results**

94

### 95 **Spatial transcriptomics revealed distinct molecular regionalization of murine colonic** 96 **epithelium at steady state condition**

97 To characterize the transcriptomic landscape of the colon tissue at steady state condition, we  
98 processed frozen colons for ST using the Visium (10X Genomics) platform (Fig. 1A). The pre-  
99 filtered dataset corresponded mostly to protein coding genes (Extended Data Fig. 1A). Upon  
100 filtering out non-coding RNAs (ncRNAs) and mitochondrial protein coding genes, the resulting  
101 dataset consists of 2604 individual spots, with an average of ~4125 genes and ~11801 unique  
102 transcripts per spot (Extended Data Fig. 1B). First, we deconvolved the spatial transcriptomic  
103 dataset using non-negative matrix factorization (NNMF) to infer activity maps<sup>12</sup>, and we  
104 restricted the analysis to only 3 factors that capture the most basic structure of the colon at  
105 steady state conditions (d0) (Fig. 1B). We identified 3 basic structural transcriptomic landscapes  
106 that were histologically discernible as intestinal epithelial cells (IEC) (NNMF\_3), muscle

107 (NNMF\_2), and a mixture between lamina propria (LP) and IEC (NNMF\_1), which were  
108 indistinguishable from the IEC towards the most distal colon (Fig. 1B). Analysis of the top  
109 contributing genes for each factor confirmed the identity of the muscle and IEC, and the mixed  
110 signature between IEC, muscle, and LP (Fig. 1C). Using immunohistochemistry (IHC) data from  
111 the human protein atlas <sup>13</sup>, we validated the specific expression of CDH17 (also known as liver-  
112 intestine cadherin or LI cadherin)<sup>14</sup> and TAGLN (transgelin, smooth muscle marker) in the IEC  
113 and muscularis layer, respectively (Fig. 1D). By contrast, ADH1 (alcohol dehydrogenase 1)  
114 showed a mixed expression between the LP and IEC compartments (Fig. 1D). To better  
115 visualize the molecular regionalization both across the proximal-distal and serosa-luminal axis,  
116 we digitally unrolled the colon (Extended Data Fig. 2A and Fig. 1E) as described in methods. In  
117 line with the ST expression in Fig. 1C, the muscle, LP/IEC and proximal IEC factors were  
118 enriched in the corresponding regions of the distal-proximal and serosa-luminal axis of the  
119 digitally unrolled colon (dark dots in Fig. 1E). Among the genes driving factor 3 (NNMF\_3) we  
120 found *Car1*, *Mettl7b*, *Emp1*, *Fabp2*, and *Hmgcs2* that were highly expressed in the proximal  
121 colon (Fig. 1F and Extended Data Fig. 2B). Our data aligns with reports showing *Car1* promoter-  
122 driven expression in the proximal but not distal colon <sup>15</sup>. In contrast, *Retnlb*, *Spr2a2* and *Ang4*  
123 were enriched in the mid colon, and *Prdx6*, *Tgm3*, *Ly6g*, *Eno3*, and *B4galt1* were enriched in  
124 the distal colon (Fig. 1F and Extended Data Fig. 2B). Because they have not been previously  
125 described as markers for the distinct colonic compartments, we used qPCR to validate the  
126 region-specific mRNA expression of genes coding for the ketogenic rate-limiting enzyme,  
127 mitochondrial 3-hydroxy-3-methylglutaryl-CoAsynthase 2 (HMGCS2), the antimicrobial peptide  
128 angiogenin 4 (ANG4), and the Beta-1,4-galactosyltransferase 1 (B4GALT1)( Fig. 1G).  
129 Therefore, ST analysis distinguished a stratification between the LP, IEC, and muscle  
130 compartment which is clearly evident at the proximal but not distal colon.  
131 Some studies have shown structural and functional differences between proximal and distal  
132 colon, specifically with respect to the epithelium <sup>15-20</sup>; however, systematic and unsupervised  
133 molecular regionalization of the colon is lacking. To objectively identify genes differentially  
134 expressed in specific compartments of the colon, we used the NNMF method to distinguish  
135 relevant sources of variability of the data <sup>12</sup>. Detailed factor analyses of the naive colon (denoted  
136 with “n”) resulted in a more pronounced/apparent colonic compartmentalization, in which the top  
137 genes defining a factor were sufficient to specifically demarcate the regionalization in the colon  
138 (Extended Data Fig. 3A-B). In particular, these factors defined a proximal-distal and a serosa-  
139 luminal axis (Fig. 1H). Functional enrichment analysis using the top contributing genes of factors  
140 defining the proximal and distal colonic IEC suggested that the murine proximal colon is

141 specialized in water absorption, while the distal colon is specialized in solute transport  
142 (Extended Data Fig. 3C), indicating functional differences between the proximal and distal IEC  
143 compartments. Altogether, ST permitted the identification of a previously unappreciated level of  
144 colonic molecular compartmentalization in the steady state colon, as summarized in Fig. 11.

145

#### 146 **Visualization of lymphoid structures by factors enriched with B-cell associated genes**

147 Next, we examined the capacity of our dataset to resolve macroscopic structures, such as  
148 lymphoid clusters, within the tissue. We observed an enrichment of B cell-associated genes in  
149 factors 1n, 3n and 9n (Fig. 2A). Upon mapping these factors onto the colonic tissue, we  
150 observed that factors 1n and 3n defined structures that resembled lymphoid aggregates, known  
151 as isolated lymphoid follicles (ILF) and/or cryptopatches (CP) (Fig. 2B). In contrast, factor 9n  
152 defined the colonic LP and was characterized by high expression of genes such as *Igha*, *Jchain*,  
153 *Igkc* characteristic of plasma cells (Fig. 2B). Among top-listed genes found in factor\_3n, we  
154 validated *Clu* protein expression in lymphoid follicles<sup>21</sup> (Fig. 2C). Similarly, expression of  
155 JCHAIN, a small 15 kDa glycoprotein produced by plasma cells that regulates multimerization of  
156 secretory IgA and IgM and facilitates their transport across the mucosal epithelium<sup>22</sup>, was  
157 validated by IHC in the human colonic LP (Fig. 2C). Pathways analysis confirmed that these  
158 factors were associated with immune responses (Fig. 2D). Whereas pathways associated with  
159 factor 3n suggested sites of lymphocyte priming (defined by processes associated with  
160 lymphocyte activation), pathways associated with factor 9n suggested sites of effector immune  
161 responses (defined by processes associated with adaptive immunity) (Fig. 2D). Interestingly,  
162 factor\_1n, which defined the cells/region overlying the ILF, was characterized by genes such as  
163 *Ccl20* known to recruit CCR6<sup>+</sup> B cells<sup>23,24</sup> and *Il22ra2/Il22bp*, a soluble receptor that neutralizes  
164 the effects of IL-22, a pleiotropic cytokine primarily expressed by lymphoid tissue inducer cells  
165 (LTis)<sup>25</sup>. In addition, factor\_1n was associated with pathways involved in cell mobilization and  
166 response to external stimulus (Fig. 2D). Because of the observation that factor 1n defines ILFs,  
167 it is tempting to propose that factor 1n-defined structures may serve as an anlagen for further  
168 maturation into ILF (factor\_3n).

169

#### 170 **Factor analysis identified molecular signatures that define areas associated with the** 171 **enteric nervous system**

172 Factor 6n was characterized by an enrichment of enteric nervous system (ENS)-associated  
173 genes which were located in the muscle area (Fig. 2E). Among the top-listed genes, we  
174 validated ubiquitin C-terminal hydrolase L1 (UCHL1) (Fig. 2E), which is specifically expressed in

175 neurons<sup>26</sup>. Functional enrichment analysis confirmed that factor\_6n defined a transcriptomic  
176 profile associated with the ENS (Fig. 2F). In summary, the resolution of our Visium dataset  
177 permitted the identification of known structures (e.g. ENS and ILFs; Fig. 2G), thereby providing  
178 a platform to further investigate specific molecular circuitry within such regions.

179

### 180 **Molecular landscape of intestinal mucosal healing**

181 Next, we sought to spatially resolve the colonic transcriptomic landscape during mucosal  
182 healing. We took advantage of our recent work showing that by day (d)14, the intestinal barrier  
183 integrity is restored following damage induced by dextran sodium sulfate (DSS)<sup>10</sup>. Therefore, we  
184 treated wild type (WT) mice with DSS in drinking water for 7 days followed by 7 days of recovery  
185 and d14 colonic tissue was taken to generate frozen Swiss-rolls to be processed for ST (Fig.  
186 3A). Despite the recovery at a physiological level (i.e. body weight gain) (Extended Data Fig.  
187 4A), the colonic tissue after DSS treatment did not fully return to homeostasis, as demonstrated  
188 by its reduced length (a sign of inflammation) (Extended Data Fig. 4B).

189 At the histological level, large lymphoid patches, as well as the muscle and mucosal layer  
190 across the intestine, were easily identified (Extended Data Fig. 4C). Hematoxylin and eosin  
191 (H&E) sections annotated by a blinded pathologist revealed the heterogeneity of the tissue,  
192 including the presence of isolated lymphoid follicles (ILFs), as well as areas with edema,  
193 hyperplasia, crypt duplication, and normal tissue (Extended Data Fig. 4D). Of note, the distal  
194 colon (center of the Swiss roll) showed marked alterations, whereas the proximal colon (outer  
195 Swiss roll) seemed non-affected (Extended Data Fig. 4D).

196 The d14 ST dataset consisted of 3630 individual spots with a number of unique genes per spot  
197 (nFeature\_RNA) that was comparable to the d0 tissue section (Extended Data Fig. 1A). To first  
198 appreciate how the process of mucosal healing spatially altered the colonic transcriptome, the  
199 ST data from d0 and d14 were embedded in 3 dimensions using Uniform Manifold  
200 Approximation and Projection (UMAP). The values of these 3 dimensions were then re-scaled  
201 into a unit cube (with a range of 0 to 1) and used as channels in CMYK color space to generate  
202 a specific color for each ST spot (Fig. 3B, bottom part). Interestingly, lymphoid follicles  
203 (identified by H&E staining) and areas in the proximal colon showed high similarity (i.e. same  
204 color) between d0 and d14 samples (Fig. 3C), suggesting that these structures are  
205 transcriptionally less affected during the process of mucosal healing following intestinal injury.  
206 Vice versa, in line with the histo-pathological scoring, the distal portion of the d14 colon was the  
207 most dramatically affected region.

208 To visualize how the colonic tissue is transcriptionally organized in different areas, we integrated  
209 the data from d0 and d14 using harmony<sup>27</sup> and performed cluster analysis. We annotated 17  
210 distinct clusters, which were visualized by embedding the data in 2 dimensions with UMAP (Fig.  
211 3C). Differentially up-regulated genes per cluster are summarized in a heatmap showing the top  
212 conserved genes in each cluster (Fig. 3D). Each cluster defined a distinct geographic area of  
213 the tissue (Extended Data Fig. 5) For instance, cluster 12 designated the ENS, with scattered  
214 expression in the submucosal layer, whereas cluster 0 mapped spatially to the proximal colon  
215 (Fig. 3E). Interestingly, genes defining cluster 0 expanded towards the mid colon during  
216 mucosal healing (d14)(Fig. 3E). Among these genes, *Muc2* and *Reg3b* showing expanded  
217 expression towards the mid colon (Fig. 3F) play a key role in establishing the barrier integrity.  
218 Using qPCR, we validated the expanded expression of *Reg3b* during mucosal healing (Fig. 3G).  
219 Overall, cluster analysis revealed that despite the existence of a conserved transcriptional  
220 colonic regionalization, the process of tissue healing underlies the emergence of distinct  
221 molecular signatures and alters the distribution of specific gene expression.

222

### 223 **Non-negative matrix factorization analysis revealed a previously unappreciated** 224 **transcriptomic regionalization during mucosal healing**

225 Even though the majority of the tissue was defined by clusters equally represented on both time  
226 points, some clusters displayed a partial or drastic enrichment during tissue healing. Cluster 3  
227 (found in the distal colon at the interface between the LP and the muscularis layer), cluster 11  
228 and 16 (localized in the damaged area of d14 distal colon) and cluster 13 (marking lymphoid  
229 follicles) were drastically enriched during d14 (Fig. 4A and S5). To visualize how the process of  
230 mucosal healing alters the transcriptomic landscape of the colon, we deconvolved the d0 and  
231 d14 datasets jointly into 20 factors using NMF (Extended Data Fig. 6 and S7). Among these, 8  
232 factors were defined by genes expressed in specific regions during mucosal healing (d14), but  
233 not at d0 (Fig. 4B). In the proximal colon, factor 1 was characterized by genes involved in bile  
234 acid and fatty acid metabolism (e.g. *Cyp2c55*, an enzyme involved in the metabolism of 19-  
235 hydroxyeicosatetranoic acid). By contrast, factors positioned in the distal colon were  
236 characterized by genes involved in inflammatory processes (e.g. *Duoxa2* and *Il18*) and tissue  
237 remodeling (e.g. *Col1a1* and *Col1a2*), among others (Fig. 4C). Due to their close proximity and  
238 their marked enrichment during mucosal healing, we focused on factors 5, 7, 14, and 20. Factor  
239 5 delineated an edematous area, which was histologically characterized by inflammation and  
240 positioned right beneath a severely injured epithelial layer with complete loss of crypt  
241 architecture (i.e. factor 14). Pathway analysis revealed that factor 5 was associated with



242 processes involving anatomical structure development, cell adhesion, and extracellular matrix  
243 (ECM) organization (Fig. 4D). Among the top genes defining this factor, we found *Igfbp5* and  
244 *Igfbp4*, as well as collagens *Col1a1* and *Col1a2* (Fig. 4C). In contrast, factor 14 was  
245 characterized by the expression of genes involved in stress response (e.g. *Duoxa2* and  
246 *Aldh1a3*) and leukocyte infiltration (e.g. *Ly6a* and *Cxcl5*), which indicate an acute response to  
247 a barrier breach and tissue damage.

248 At the end of the colonic tissue, the anus separates a mucosal tissue with a monolayered  
249 epithelium (the rectum) from a stratified squamous epithelium (skin). Homeostatic breakdown  
250 resulting from colonic inflammation generates an area of epithelial instability wherein a  
251 heterogeneous tissue at the interface between skin and colonic epithelium appears (i.e.  
252 enlarged multilayered crypt-like structures with squamous, but not cornified, appearance).  
253 Factor 7, characterized by the expression of several keratins (e.g. *Krt13*, *Krt5*, *Krt14* and *Krt6a*)  
254 and pathways involving keratinocytes differentiation and wound healing, delineated this area  
255 (Fig. 4C-D).

256 Finally, factor 20 predominantly defined the distal epithelium undergoing hyperplasia and crypts  
257 arborization, which indicates epithelial repair. Gene ontology revealed that this factor was  
258 associated with organogenesis (e.g. *Hoxb13*) and response to organic substrates (e.g.  
259 *Cyp2c68*) (Fig. 4C-D). Overall, DSS-induced injury resulted in an assorted co-occurrence of  
260 different histopathological processes within the murine colon. Furthermore, our analysis  
261 revealed a previously unappreciated heterogeneous transcriptional and regional landscape of  
262 tissue repair (Fig. 4E).

263

#### 264 **Predictive algorithms revealed coordinated signaling pathways depending on location.**

265 We interrogated if distinct signaling pathways could be inferred by the spatially organized  
266 transcriptional profiles by using PROGENy<sup>28,29</sup>. Unlike other Gene Set Enrichment tools (as  
267 KEGG), PROGENy estimates signalling pathway activities by looking at expression changes of  
268 downstream genes in signaling pathways, which provides a more accurate estimation of the  
269 activity of the pathway. A score for each of the 14 pathways annotated in PROGENy (i.e. Wnt,  
270 VEGF, Trail, TNF $\alpha$ , TGF $\beta$ , PI3K, p53, NF $\kappa$ B, MAPK, JAK/STAT, Hypoxia, Estrogen, Androgen  
271 and EGFR) was estimated for each ST spot on d0 and d14 slides (see methods). First, we  
272 computed a correlation matrix to understand how the spatially organized transcriptional  
273 programs identified by NNMF (i.e. factors of Fig. 4) could be explained by signalling pathway  
274 activities. We observed two main groups, in which, group 2 pathways (Androgen, JAK-STAT,  
275 NF $\kappa$ B, TNF $\alpha$ , p53, Hypoxia and Trail), characteristic of an inflammatory/acute response to

276 damage, were associated with factors comprising damaged distal epithelium (e.g. factor 7, 10,  
277 14, 20) and proximal epithelium (factor 11, 19)( Fig. 5A-B). In contrast, group 1 pathways  
278 (TGF $\beta$ , Wnt, PI3K, Estrogen and EGFR), normally regulating pro-regenerative/tissue  
279 remodeling processes, were associated with factors defining the tissue beneath the damaged  
280 epithelium (e.g. factor 5 and 17), the muscle layer (factor 2, 6 and 12) and lymphoid follicles  
281 (factor 9) (Fig. 5B). In addition, MAPK and VEGF pathways were associated with similar factors,  
282 and as expected, the spatial patterns of MAPK and VEGF pathways activity were comparable  
283 (Fig. 5C). Of note, at steady state conditions (d0) MAPK and VEGF pathways were  
284 homogeneously active along the mid-distal colon, whereas during mucosal healing, their  
285 activation was higher within the damaged/regenerating areas (Fig. 5C, black arrows).

286

### 287 **Shared and complementary pathway activities during mucosal healing**

288 Comparable TNF $\alpha$ , NF $\kappa$ B, and JAK-STAT pathway activation scores between some factors  
289 (e.g. factor 10 and 14) (Fig. 5A) suggest interconnectivity between these inflammatory  
290 pathways. To test this possibility we further analyze the spatial pattern of these pathways. In  
291 particular, the activities of the TNF $\alpha$  and NF $\kappa$ B pathways were almost identical within the colon,  
292 regardless of the time point analyzed (Fig. 5D). Higher TNF $\alpha$  and NF $\kappa$ B activities were  
293 appreciated in areas associated with injury and ILFs (Fig. 5D). Of note, in the absence of  
294 damage/inflammation (d0), the spatial distribution of TNF $\alpha$  and NF $\kappa$ B showed activity confined  
295 to the ILF luminal edge (Fig. 5D, d0), in agreement with previous studies showing that TNF  
296 drives ILF organogenesis<sup>30</sup>. Whether ILF forms where subclinical local damage occurs or  
297 whether their presence, which allows dynamic exchange with the external environment, causes  
298 subclinical inflammation, remains to be explored.

299 In contrast, JAK-STAT pathway activation showed co-occurrence with TNF and NF $\kappa$ B mostly in  
300 the damaged area (factor 14), but not in ILFs (Fig. 5D). These results suggest that although all  
301 three pathways may play a role within the damaged tissue, TNF $\alpha$  and NF $\kappa$ B, but not JAK-STAT,  
302 are involved in the formation/function of ILFs. Unlike these pathways, androgen and estrogen  
303 pathways showed mutually exclusive patterns of activity. Higher androgen pathway activity was  
304 observed in areas of injured epithelium, while higher estrogen activity was associated with the  
305 muscle layer (arrows, Fig. 5E), suggesting that these pathways negatively regulate each other  
306 during mucosal healing.

307

### 308 **Low p53 pathway activity is associated with proliferating crypts**

309 Activation of the p53 pathway was homogeneously distributed across the proximal-distal axis,  
310 but it showed more activity in the luminal side compared with the LP and muscle layer (Fig. 5F).  
311 Interestingly, p53 activity was lower in the damaged area (box ii in Fig. 5F). Activation of p53  
312 triggers cell cycle arrest, senescence, and apoptosis<sup>31</sup>, suggesting that spots with decreased  
313 p53 activity might be enriched in proliferating cells within the damaged area. To test this  
314 possibility, we overimposed lower p53 activity spots onto the H&E images and showed co-  
315 localization with the bottom of crypts (Fig. 5F, H&E boxes). To investigate if proliferating stem  
316 cell signatures co-localize with low p53 activity spots, we took advantage of our single cell RNA  
317 sequencing (scRNAseq) dataset of intestinal epithelial cells from d14 colon and identified a  
318 population of proliferating stem cells (Fig. 5G). We mapped the stem cell core signature onto the  
319 d14 colon ST datasets, and we superimposed the spots with high scores in the stem cell core  
320 onto the H&E section. In agreement with our hypothesis, spots containing high scores (Fig. 5G)  
321 coincided with low p53 activity (Fig. 5F). Pearson correlation analysis confirmed that ST spots  
322 with high stem cell scores negatively correlated with p53 activity (Fig. 5H). Thus, our data  
323 suggest that low p53 activity allows the identification of proliferating crypts during mucosal  
324 healing. In summary, we spatially positioned clinically relevant pathways predicted by  
325 PROGENy and showed that these pathways are highly coordinated during mucosal healing.

326

### 327 **Integration of human datasets with mouse spatial transcriptomic**

328 To enquire about the translational potential of the murine colonic ST, we investigated whether  
329 human datasets could be integrated into murine ST data. Towards this end, we took advantage  
330 of a human developing gut dataset<sup>32</sup> and mapped 31 distinct epithelial and stromal cells onto  
331 our ST dataset (Fig. 6A). We observed correlations between human cells types and distinct  
332 murine ST factors (Fig. 6B), indicating specific localization of human cell signatures within the  
333 mouse colon. Interestingly, the signature of human proximal enterocytes is highly correlated  
334 with factor 1 (Fig. 6B), defining the most proximal epithelium in mice (Extended Data Fig. 8A).  
335 Human distal enterocytes and absorptive cells highly correlated with factors 3 and 10 (Fig. 6B),  
336 which defines the most distal epithelium in mice (Extended Data Fig. 8A). These results indicate  
337 that the transcriptomic features defining proximal and distal epithelial cells are conserved  
338 between mouse and humans. On the other hand, two human stromal cells characterized by the  
339 expression of the chemokines CCL21 and CXCL13 uniquely and strongly correlated with factor  
340 9, defining lymphoid follicles (Fig. 6B), which is in agreement with the well-known role of these  
341 chemokines in ILF development<sup>33</sup>. Interestingly, these stromal cells mapped in complementary  
342 patterns within the mouse ILF (Fig. 6C), suggesting that the coordinated action of these cells

343 might determine the recruitment/localization of immune cells within the follicle. Next, we  
344 analyzed the damage/regeneration area (factor 5 and 14) which correlated with S1 (Stromal 1,  
345 fibroblast marking bulk of submucosal structural cells in human), S1-COL6A5 and S1-IFIT3  
346 human cells (two subtypes of S1) (Fig. 6B) and mapped in a complementary pattern of  
347 distribution (Extended Data Fig. 8B).

348 We then extend our analysis to other cell types during mucosal healing (Fig. 6D and Extended  
349 Data Fig. 8C). Interestingly, immune cells, mesothelium, endothelium and fibroblast signatures  
350 were spatially enriched within defined areas during mucosal healing. In particular, fibroblasts  
351 were dominant in factor 5 (remodeling) and immune cells in factor 9 (lymphoid follicles),  
352 whereas endothelial and mesothelial cells colocalized within factor 7 (keratinization) (Fig. 6D  
353 and Extended Data Fig. 8D). Among 10 distinct immune cell types identified<sup>32</sup>, monocytes and  
354 SPP1+ macrophages were enriched in factor 14 (danger response) and in factor 5 (tissue  
355 remodeling) respectively, in line with their known roles in acute response to injury and matrix  
356 deposition/wound healing (Extended Data Fig. 8E). Lymphocytes and dendritic cells, instead,  
357 were enriched in factor 9 (lymphoid follicles) (Fig. 6E and Extended Data Fig. 8E). Further  
358 analysis showed how these immune cells are heterogeneously distributed within the ILF (Fig.  
359 6E). These results provide a proof-of-concept and support the notion that principles of spatial  
360 distribution within the colonic tissue appear to be conserved between species and highlight  
361 murine ST as a valuable platform for exploring and translating findings on distribution patterns of  
362 cells/genes within a tissue.

363

### 364 **Mapping transcriptomic datasets onto ST to inform medical practice**

365 In order to establish a framework to integrate existing knowledge with ST datasets, we took  
366 advantage of our longitudinal RNAseq dataset of colonic tissue collected during acute epithelial  
367 injury and the recovery phase in the DSS-induced colitis model<sup>10</sup>. In this study, we identified  
368 sets of genes (called modules) displaying characteristic expression patterns, with some genes  
369 being: a) downregulated upon injury (modules 2, 8, 7), b) upregulated during the  
370 acute/inflammatory phase (modules 1, 3, 4, 9), and c) upregulated during the recovery phase of  
371 DSS colitis (modules 5, 6)<sup>10</sup>. To identify whether the different temporally regulated processes  
372 (i.e. modules) were enriched in specific areas of the tissue, we computed a correlation matrix  
373 between the gene signature of modules and ST factors (Fig. 7A). Higher gene enrichment was  
374 found in module (m)1 and m6, characterized by genes induced during the inflammatory and  
375 recovery phase, respectively (Fig 7A). Among the genes shared between factor 9 and m1,  
376 *Ptprc*, *Cd72* and *Lyz2* encode for proteins expressed by immune cells and map predominantly

377 to lymphoid follicles and damaged areas in d14 (Fig. 7Bi). In contrast, ~60% of the top driving  
378 genes defining factor 15 (i.e. ENS) were shared with m6, and their expression was distributed in  
379 the submucosa/muscularis layer where neuronal bodies reside (Fig. 7Ci). GO enrichment  
380 analysis of m1 and m2 also confirmed that the most dominant pathways were involved with  
381 inflammatory responses and chemical synaptic transmission (Fig. 7Bii and 7Cii). The correlation  
382 between temporal transcriptomic modules and spatial factors suggests that factor 9 (lymphoid  
383 follicles) and factor 15 (ENS) are characterized by an ongoing inflammatory and regenerative  
384 profile, respectively. Thus, the integration of longitudinal and ST data can be a powerful tool to  
385 unveil biological processes related to diseases in time and space.

386

### 387 **Spatial distribution of genes defining UC1 and UC2 profiles**

388 We then sought to investigate if clinically relevant patient gene signatures could be mapped  
389 onto mouse ST datasets. Toward this, we used the recent gene signature identifying ulcerative  
390 colitis (UC) subgroups of patients: UC1 and UC2<sup>10</sup>. This molecular classification is clinically  
391 relevant because the UC1-related transcriptomic signature is associated with poor responses to  
392 biological therapies and is enriched with genes involved in neutrophil activity. In contrast,  
393 approximately 70% of UC2 patients achieved a clinical response to *anti-TNF* antibodies<sup>10</sup>. In  
394 addition, Smillie et al.,<sup>34</sup> showed that inflammatory fibroblasts and monocytes mainly drive anti-  
395 TNF resistance, and many of the genes upregulated in UC1 patients colonic tissue are highly  
396 expressed by these cell types. To further understand the spatial distribution of differentially  
397 expressed genes between UC1 and UC2 patients, we mapped all genes upregulated in either  
398 UC1 and UC2 patients onto colon ST. Whereas genes defining UC2 patients were  
399 homogeneously expressed across the colon (d0 and d14) (Fig. 7D), genes defining UC1 were  
400 mostly localized within the damage/repair area at d14 (Fig. 7D). Further investigation revealed  
401 that all the main functional classes upregulated in UC1 patients, including collagen synthesis  
402 (*Col12a1*, *Col4a1*, *Col4a2*, *Col7a1*), ECM breakdown (*Mmp3*), Wnt-signalling pathway (*Wnt5a*),  
403 cytokine signalling (*Il11*, *Il1b*, *Il33*, *Il1r2*, *Il1rn*, *Tnfrsf11b*, *Csf2rb*, *Csf3r*, *Socs3*, *Trem1*, *Cxcr2*)  
404 and innate immunity (*S100a9*, *S100a8*, *C5ar1*, *Sell*, *S100a4*), were also upregulated in areas of  
405 tissue damage Fig. S9A). In summary, these results suggest that UC1 patients may possess  
406 higher tissue damage and ulceration compared with UC2 patients.

407

### 408 **Defining the topography of IBD risk genes**

409 Spatial transcriptomics of the colon undergoing injury/repair provides an opportunity to  
410 comprehensively map IBD-associated risk genes. Therefore, we interrogated the expression

411 pattern of various human IBD-risk genes<sup>35-39</sup> on the ST profile of d0 and d14 colonic tissue. Out  
412 of the 122 interrogated genes, 95 IBD-risk genes were selected based on the existence of their  
413 murine ortholog and their detectable expression in the ST dataset. In order to identify whether  
414 the spatial expression of these variants defined topographic patterns within the tissue, we  
415 computed a correlation matrix (Extended Data Fig. 9B). Cluster analysis resulted in three main  
416 co-expression clusters, with cluster 3 possessing the highest spatial expression correlation  
417 between genes (Extended Data Fig. 9B). Functional annotation of the genes within this cluster  
418 revealed enrichment in pathways related to immune cell recruitment (e.g. *Itgal*, *Icam1*, *Itga4*),  
419 activation (e.g. *Cd6*, *Plcg2*, *Ncf4*, *Il10ra*), and antigen presentation (e.g. *Tap1*, *Tap2*, *Psm8*).  
420 To understand the spatial distribution of genes belonging to cluster 3, we mapped them onto the  
421 colonic tissue using ModuleScore, a Seurat function assigning a score in the ST dataset to a set  
422 of predefined genes (i.e. cluster 3 genes). In line with the functional annotation of cluster 3  
423 genes, we observed enrichment in lymphoid follicles areas both on d0 and d14 (Fig. 7E). To  
424 understand which ST factors were enriched with IBD risk genes, we performed Gene Set  
425 Enrichment Analysis (GSEA) and calculated overrepresentation scores of IBD-risk variants in  
426 the NMF dataset (Extended Data Fig. 6-7). This analysis showed that factor 9, defining  
427 lymphoid follicles within the tissue (Extended Data Fig. 6), was the only factor with significant  
428 enrichment of IBD risk genes (Fig. 7F). Altogether, this analysis revealed that the expression of  
429 a subset of human IBD-risk genes spatially co-occur within the murine colon. Their specific  
430 expression pattern suggests that colonic tissue lymphoid follicles might define the area to  
431 potentially target when developing therapeutic strategies for IBD patients displaying aberrant  
432 immune activation.

433

## 434 **Discussion**

435 We and others have deeply characterized the transcriptomic landscape during mucosal healing  
436 in the colon and small bowel<sup>10,40,41</sup>. However, these studies lacked the spatial resolution  
437 describing where genes were expressed. Here, we spatially placed cell populations and  
438 pathways that might play pivotal roles in driving tissue response to damage. The current study  
439 uncovered spatial transcriptomic patterns that are present at steady state conditions and that  
440 arise in response to damage; these spatial transcriptomic patterns were characterized by unique  
441 transcriptional signatures and coincided with different histological processes. Moreover, we  
442 profiled the regional distribution of different biological processes, such as acute response to  
443 injury or a regenerative response. Finally, we demonstrated the clinical relevance of this dataset

444 as seen by conserved spatial localization of gene signatures in human tissue and  
445 transcriptomics data and by testing the distribution of clinically-relevant genes.

446

447 A recent study characterized the transcriptomic landscape during human gut development <sup>32</sup>.  
448 Here, we further these results by taking advantage of murine colonic Swiss rolls that fit the 6.5  
449 mm<sup>2</sup> area constraints provided by the manufacturer to perform spatial transcriptomics. This  
450 approach enabled us to visualize the transcriptomic landscape of the whole colon in the same  
451 slide, including the most proximal and distal segments. In combination with bioinformatics tools  
452 (NNFM analysis), we uncovered a previously unappreciated molecular regionalization of the  
453 colonic tissue in steady state conditions. This analysis allowed the identification of distinct  
454 epithelial, LP, and muscularis/submucosa genetic programs depending on their proximal to  
455 distal colon localization. Importantly, when mapping human cells into our ST datasets, we  
456 observed conservation in transcriptomic features defining proximal and distal locations,  
457 suggesting that our newly described molecular segmentation is conserved across mammals.

458

459 Using the entire murine colon, we provided a detailed analysis of a previously unappreciated  
460 compartmentalization of the tissue repair process. In line with previous reports <sup>42</sup>, our unbiased  
461 analysis of the transcriptomic landscape during mucosal healing reveals that while dramatic  
462 transcriptomic changes occur in the distal colon, the proximal colon remains almost comparable  
463 to the steady state. Two potential scenarios can be proposed: a) the level of damage is  
464 homogenous and the proximal colon heals faster compared with the distal colon; or b) the  
465 proximal colon is more protected compared with the distal colon. Dramatic changes in the distal  
466 rather than the proximal colon are in agreement with the phenotype observed in UC patients,  
467 where the focus of inflammation extends proximally from the rectum <sup>43</sup>. In addition, genes and/or  
468 pathways, such as the JAK-STAT and TNF $\alpha$  pathway <sup>44</sup> or genes/pathways characterizing UC1  
469 patients <sup>10</sup>, were found to be dominant in the distal colon, suggesting that DSS-induced colitis is  
470 a clinically relevant experimental model of UC1. Whether higher levels of damage/tissue repair  
471 in the distal colon depend on microbiota, host-induced responses to the microenvironment, or  
472 just different kinetics, remains to be addressed.

473

474 At steady state conditions, we identified molecular signatures associated with lymphoid  
475 structures. Unlike Peyer's patches (PP) that are macroscopically visible in the murine small  
476 intestine, CP and ILF cannot be dissected and analyzed separately from the rest of the colonic  
477 tissue for transcriptomic readouts. For instance, enrichment in the NF $\kappa$ B and TNF $\alpha$  pathway

478 activity was detected in the lumen-facing area corresponding to the epithelial layer overlaying  
479 lymphoid clusters in steady state. Because these pathways are usually associated with immune  
480 activation/inflammatory responses, these data suggest that ILF-associated epithelium is  
481 undergoing inflammation. Moreover, expression of clusterin (*Clu*) alone was found to be highly  
482 specific and sufficient in defining the isolated lymphoid follicles (ILF). Previous studies have  
483 reported *Clu* expression in follicular dendritic cells (FDC),<sup>45</sup> as well as M cells<sup>21</sup> in the Peyer's  
484 patches. While *Clu* expression in FDCs serves as a pro-survival factor for germinal center B  
485 cells in the follicle, the role of *Clu* in M cells is not clear. Interestingly, a recent study<sup>40</sup> identified  
486 *Clu* as a marker of intestinal stem cells (ISC), known as revival stem cells, which are rarely  
487 found in steady state, but are predominantly found in regenerating intestine following injury.  
488 Whether the expression of *Clu* in the ILF- and follicle-associated epithelium has any bearing  
489 during colonic infection and regeneration needs to be further investigated.

490  
491 Besides the proximal-distal variance in the transcriptomic alterations during tissue repair, our  
492 NMF analysis revealed a high degree of compartmentalization within the distal colon itself. At  
493 least 5 factors were delineating topographically and transcriptionally distinct areas in the distal  
494 colon undergoing different biological responses to tissue injury. Such heterogeneity is likely the  
495 result of different healing programs, such as skin-like re-epithelialization (factor 7), acute  
496 damage (factor 14) and tissue regeneration (factor 20). Supporting this notion, the integration of  
497 our RNAseq kinetic dataset<sup>10</sup> into the ST map revealed that certain areas of the distal colon  
498 were transcriptionally closer to samples from the acute phase of DSS colitis (i.e. d6 to d8). The  
499 asynchronous nature of the healing process may be associated with varying degrees of  
500 exposure to the external environment and the elaborate architecture of the tissue. Similarly, in  
501 human IBD, the "patchiness of the inflammatory response" is a well-known characteristic of  
502 Crohn's disease. In UC, the inflammation is traditionally thought to be continuous with  
503 increasing intensity in distal colon, but longitudinal sampling has revealed episodes of both  
504 macroscopic and microscopic patchiness of inflammation<sup>46</sup>. Our dataset thus provides a  
505 valuable resource to interrogate the transcriptional programs underlying distinct temporal and  
506 biological processes of tissue healing.

507 PROGENy allows the prediction of pathways activated in specific regions of the colon. Our  
508 analysis revealed a strong correlation between pathway activities, such as  $\text{TNF}\alpha$  and  $\text{NF}\kappa\text{B}$ ,  
509 suggesting that one pathway might depend completely on the other. We also identified that the  
510 area of injury is characterized by several pathways that are also increased on the ILF edge at  
511 steady state conditions, suggesting that the formation of lymphoid follicles result in the induction



512 of damage-associated pathways. Finally, decreased p53 activity represents a good strategy to  
513 identify damage-associated proliferating crypts. These data suggest that within the same region,  
514 intestinal crypts are heterogeneous in their response to damage; our dataset provides a toolkit  
515 to investigate this composite response.

516

### 517 **ST to inform clinical practice**

518 Our study provides evidence that ST can be used to map clinically relevant genes and  
519 pathways. Genes characterizing a newly described UC subgroup were associated with poor  
520 treatment response in the damaged area of the regenerating colon. Previous studies confirm  
521 these results; increased inflammation severity predicted poor response to anti-TNF treatments  
522 <sup>47</sup> or blocking cell recruitment to the inflamed intestine using anti- $\alpha$ 4b7 antibodies <sup>48</sup>. As a result  
523 of severe inflammation, colonic ulceration may lead to lower therapeutic responses due to  
524 decreased blood drug concentration/drug leakage <sup>49</sup>. Our data suggest that UC1 patients have  
525 increased tissue damage compared with UC2 patients, which might contribute to their poor  
526 response to biological therapies.

527

### 528 **Acknowledgments**

529 We thank members of the Villablanca lab for helpful comments and Maria Lim for editorial  
530 assistance. We thank Kim Thrane for her invaluable expertise in setting up the Visium  
531 experiments and for help with tissue imaging. C.E. was supported by the Marie Skłodowska-  
532 Curie grant agreement No 844712. L.L. was funded by grants from the Helmsley foundation.  
533 E.J.V. was supported by grants from the Swedish Research Council, VR grant K2015-68X-  
534 22765-01-6 and 2018-02533, Formas grant nr. FR-2016/0005, Cancerfonden (19 0395 Pj), and  
535 the Wallenberg Academy Fellow program (2019.0315). The computations and data handling  
536 were enabled by resources provided by the Swedish National Infrastructure for Computing  
537 (SNIC) at KTH partially funded by the Swedish Research Council through grant agreement no.  
538 2018-05973. Some schematics were partially created with BioRender.com.

539

### 540 **Author Contributions**

541 SMP, SD, AF, OED, RM, XL, GM, and CE performed experiments. LL, ROR, KPT, and KS  
542 performed bioinformatics analysis of the transcriptomic data. EJV and SD conceived the idea.  
543 NG, JSR, and JL provided resources. SMP, LL, and EJV wrote the paper. All authors discussed  
544 the data, read, and approved the manuscript.

545

546 **Declaration of Interests**

547 E.J.V. has received research grants from F. Hoffmann-La Roche. C.E., L.L. and J.L. are  
548 scientific consultants for 10X Genomics Inc.

549

550 **Main Figure legends**

551

552 **Fig. 1, Spatial transcriptomics reveals molecular regionalization of the murine colonic**  
553 **tissue in steady state.**

554 (A) Schematics of the experimental design: the colonic tissue from a naive wild type mouse  
555 was processed as a Swiss roll for spatial transcriptomic (ST) with VISIUM 10X  
556 technology.

557 (B) Colon Swiss rolls shown in hematoxylin and eosin staining (left) and with each ST spot  
558 color coded based on non-negative matrix factorization (NNMF) (right). ST spots  
559 belonging uniquely to one factor are colored in red, blue and green for NNMF1, 2 and 3  
560 respectively. ST spots shared between different factors are colored with respective  
561 intermediate gradation of these 3 colors.

562 (C) Top: spatial distribution of the 3 factors distinguishing muscle, lamina propria (LP) and  
563 intestinal epithelial cells (IEC). Bottom: heatmap showing the top 20 genes defining each  
564 factor.

565 (D) Immunohistochemical staining of CDH17, TAGLN, ADH1 in healthy human colonic  
566 tissue (from Human Protein Atlas).

567 (E) Digitally unrolled colonic tissue, showing the distribution of the 3 factors from Fig. 1C  
568 along the serosa-luminal and proximal-distal axis.

569 (F) Proximal to distal distribution of *Hmgcs2*, *Ang4* and *B4galt1* expression in colonic swiss  
570 rolls (left) and digitally unrolled colon (right).

571 (G) qPCR validation of regional expression of *Hmgcs2*, *Ang4* and *B4galt1* in proximal, mid  
572 and distal colonic biopsies from wild type mice (n=3, each dot represents one mouse).

573 (H) Spatial distribution of 9 out of 20 factors in the naive colon displaying transcriptional  
574 regionalization along the serosa-luminal and proximal-distal axis. Each ST spot is  
575 assigned a color-coded score based on the expression of the genes defining each  
576 factor.

577 (I) Schematic representation of the colon (top) and top genes annotated in Factors  
578 describing molecular regionalization of the naive colon (bottom). Factors are grouped

579 based on their proximal-distal distribution and color-coded (i.e. grey-pink-purple) based  
580 on their serosa-luminal distribution.

581

582 **Fig. 2, Identification and regional distribution of lymphoid follicle, B cell-associated, and**  
583 **enteric nervous system signatures in the naive murine colon.**

584 (A) Heatmap of the top genes defining factors 1n, 3n and 9n enriched in B cell signature.

585 (B) Spatial distribution of B cell-associated factors in the naive colon.

586 (C) Immunohistochemical staining of CLU (enriched in lymphoid follicles) and JCHAIN  
587 (localized in the lamina propria) in healthy human colonic tissue (from Human Protein  
588 Atlas).

589 (D) Functional enrichment analysis (GO) of factors 1n, 3n and 9n.

590 (E) Top: spatial distribution (left) and top genes (right) defining factor 6n (enteric nervous  
591 system). Bottom: immunohistochemical staining of UCHL1 (neuronal marker) in the  
592 colonic submucosa of healthy human colonic tissue (from Human Protein Atlas).

593 (F) Pathway analysis (GO) of factor 6n.

594 (G) Schematic representation of spatial distribution of B cell factors (i.e. 1n, 3n and 9n from  
595 Panels A-D) and ENS-factor 6n (from Panel E-F).

596

597

598 **Fig. 3, Changes of the molecular topography during mucosal healing are dominant at the**  
599 **distal colon**

600 (A) Schematic representation of the experiment: colitis was induced by dextran sodium  
601 sulfate (DSS) administration in drinking water for 7 days followed by 7 days of regular  
602 water to promote tissue repair. Colonic tissue from a wild-type naive mouse (d0, from  
603 Fig. 1) and from a mouse undergoing colonic regeneration (d14) were processed as  
604 Swiss roll for spatial transcriptomic using Visium 10X technology.

605 (B) Top: Hematoxylin and eosin staining of colonic tissue from d0 and d14. Bottom: spatial  
606 representation of UMAP values in CMYK colors on colon d0 and d14. Spots with the  
607 same color in the two time points represent transcriptionally similar regions.

608 (C) Uniform Manifold Approximation and Projection (UMAP) representation of 16 color-  
609 coded clusters defining regional transcriptome diversity in the colonic d0 and d14  
610 datasets combined.

- 611 (D) Heatmap showing expression of top genes defining each cluster (color-coding on top) in  
612 the ST datasets from the two timepoints (light blue columns: colon d0; pink columns:  
613 colon d14).
- 614 (E) Schematic representation of cluster 0 and cluster 12 distribution in colon d0 (on the left)  
615 and d14 (on the right).
- 616 (F) Expression of selected genes in cluster 0 onto ST.
- 617 (G) qPCR validation of regional expression of *Reg3b* in proximal, mid and distal colonic  
618 biopsies from wild type mice at steady state conditions (d0) and during mucosal healing  
619 (d14)(n=3, each dot represents one mouse).

620

621 **Fig. 4, Non-negative matrix factorization reveals eight distinct molecular patterns during**  
622 **colon mucosal healing**

- 623 (A) UMAP representation of 16 clusters in d0 and d14 colon.
- 624 (B) Hematoxylin and eosin images displaying overlaid spots with the highest factor weight.
- 625 (C) Top 10 genes defining the indicated NNMFs (factors).
- 626 (D) Functional enrichment analysis (Gene Ontology, GO) based on the top genes defining  
627 factor 5, 7, 14 and 20.
- 628 (E) Schematic representation summarizing the expression pattern between selected factors.  
629 Biological processes associated with each factor are indicated in brackets.

630

631 **Fig. 5, Predictive algorithm reveals pathway-specific spatial patterns during mucosal**  
632 **healing.**

- 633 (A) Correlation matrix between non-negative matrix factorization (NNMF) and pathway  
634 activity scores determined by PROGENy
- 635 (B) Schematic of the colon area at d14 displaying the distribution of the indicated factors.
- 636 (C) Spatial transcriptomic (ST) spot heatmaps of the colon at d0 (upper swiss rolls) and d14  
637 (lower swiss rolls) showing pathways scores predicted by PROGENy. Arrows indicate  
638 areas of tissue damaged as defined by factor 14 shown in Extended Data Fig. 7 and Fig.  
639 4A-C.
- 640 (D) ST spot heatmaps showing  $TNF\alpha$ ,  $NF\kappa B$ , JAK-STAT pathway activity on d0 (upper  
641 Swiss rolls) and d14 (lower Swiss rolls). Selected areas indicated as ILF (isolated  
642 lymphoid follicles) or "i" and "ii" and outlined in black are magnified below each Swiss  
643 roll. Arrows in "ii" indicate the presence of an ILF as defined by factor 9 Extended Data  
644 Fig. 6.

- 645 (E) Spatial distribution of androgen and estrogen pathway activity at d14. Selected areas  
646 (indicated as “i” and “ii”) are magnified. Arrows indicate an example of the muscle layer  
647 showing opposite expression patterns between the two pathways.
- 648 (F) Spatial distribution of p53 pathway activity at d0 and d14. Selected areas indicated as “i”  
649 and “ii” on colon d14 are magnified on the right. Hematoxylin and eosin magnifications  
650 show the overlaid spots with the lowest p53 activity shown in “i” and “ii”.
- 651 (G) Left: UMAP visualization of IEC clusters from scRNAseq on colon d14 (Frede et al,  
652 unpublished; GSE: 163638 ). Middle: ST spots from colon d14 are color-coded based on  
653 the enrichment of stem cell core signature identified from scRNAseq dataset. Selected  
654 areas indicated as “i” and “ii” on colon d14 are magnified on the right. Right: Hematoxylin  
655 and eosin magnifications showing the overlaid spots with the highest stem cell signature  
656 shown in “i” and “ii”.
- 657 (H) Pearson correlation between PROGENy predicted pathways and stem cell signature on  
658 the ST dataset.

659

#### 660 **Fig. 6, Human cell type mapping onto murine spatial transcriptomic datasets**

- 661 (A) Scheme showing the integration of published human single cell RNAseq<sup>32</sup> and our  
662 mouse Visium datasets.
- 663 (B) Correlation matrix between transcriptomic profiles from human single cell datasets<sup>32</sup> and  
664 factors defining transcriptomics patterns in mouse ST.
- 665 (C) Integration of human stromal cell transcriptomic profiles (S4.CCL21+ and S4.CXCL13+)  
666 onto visium datasets at day 0.
- 667 (D) Integration of human intestinal cell transcriptomic profiles onto visium datasets at day 14.
- 668 (E) Integration of human immune cell transcriptomic profiles onto visium datasets at day 14  
669 and magnification of the isolated lymphoid follicle area.

670

#### 671 **Fig. 7, Spatial transcriptomic (ST) allows mapping transcriptomic signatures with clinical** 672 **relevance**

- 673 (A) Correlation matrix between transcriptomic modules distinguishing the processes of  
674 inflammation and mucosal healing during DSS-induced colitis<sup>10</sup> and factors defining  
675 transcriptomics patterns in ST.
- 676 (B) (i) Venn diagram and spatial representation of overlapping genes between module 1 and  
677 factor 9. (ii) relative mean expression and Gene Ontology (GO) of genes belonging to  
678 module 1.

- 679 (C) (i) Venn diagram and spatial representation of overlapping genes between module 6 and  
680 factor 15. (ii) relative mean expression and Gene Ontology (GO) of genes belonging to  
681 module 6.
- 682 (D) Spatial distribution of genes defining UC1 and UC2 patients on mouse ST colon d0 and  
683 d14.
- 684 (E) Spatial distribution of IBD risk genes from Cluster 3 (Extended Data Fig. 9B) on colon d0  
685 (left) and d14 (right).
- 686 (F) Gene Set Enrichment Analysis for IBD risk genes in Cluster 3 (Extended Data Fig. 9B)  
687 and NNMF factors (Extended Data Fig. 6-7).
- 688
- 689
- 690

691 **References**

- 692 1. Li, N., *et al.* Spatial heterogeneity of bacterial colonization across different gut segments  
693 following inter-species microbiota transplantation. *Microbiome* **8**, 161 (2020).
- 694 2. Mowat, A.M. & Agace, W.W. Regional specialization within the intestinal immune  
695 system. *Nat Rev Immunol* **14**, 667-685 (2014).
- 696 3. Fenton, T.M., *et al.* Immune Profiling of Human Gut-Associated Lymphoid Tissue  
697 Identifies a Role for Isolated Lymphoid Follicles in Priming of Region-Specific Immunity.  
698 *Immunity* **52**, 557-570 e556 (2020).
- 699 4. Villablanca, E.J., *et al.* MyD88 and retinoic acid signaling pathways interact to modulate  
700 gastrointestinal activities of dendritic cells. *Gastroenterology* **141**, 176-185 (2011).
- 701 5. Guan, Q. A Comprehensive Review and Update on the Pathogenesis of Inflammatory  
702 Bowel Disease. *J Immunol Res* **2019**, 7247238 (2019).
- 703 6. Blanpain, C., Horsley, V. & Fuchs, E. Epithelial stem cells: turning over new leaves. *Cell*  
704 **128**, 445-458 (2007).
- 705 7. Santos, A.J.M., Lo, Y.H., Mah, A.T. & Kuo, C.J. The Intestinal Stem Cell Niche:  
706 Homeostasis and Adaptations. *Trends Cell Biol* **28**, 1062-1078 (2018).
- 707 8. Brazil, J.C., Quiros, M., Nusrat, A. & Parkos, C.A. Innate immune cell-epithelial crosstalk  
708 during wound repair. *J Clin Invest* **129**, 2983-2993 (2019).
- 709 9. Owens, B.M. & Simmons, A. Intestinal stromal cells in mucosal immunity and  
710 homeostasis. *Mucosal Immunol* **6**, 224-234 (2013).
- 711 10. Czarnewski, P., *et al.* Conserved transcriptomic profile between mouse and human  
712 colitis allows unsupervised patient stratification. *Nat Commun* **10**, 2892 (2019).
- 713 11. Stahl, P.L., *et al.* Visualization and analysis of gene expression in tissue sections by  
714 spatial transcriptomics. *Science* **353**, 78-82 (2016).
- 715 12. Lin, X. & Boutros, P.C. Optimization and expansion of non-negative matrix factorization.  
716 *BMC Bioinformatics* **21**, 7 (2020).
- 717 13. Uhlen, M., *et al.* Proteomics. Tissue-based map of the human proteome. *Science* **347**,  
718 1260419 (2015).
- 719 14. Baumgartner, W. Possible roles of LI-Cadherin in the formation and maintenance of the  
720 intestinal epithelial barrier. *Tissue Barriers* **1**, e23815 (2013).
- 721 15. Tetteh, P.W., *et al.* Generation of an inducible colon-specific Cre enzyme mouse line for  
722 colon cancer research. *Proc Natl Acad Sci U S A* **113**, 11859-11864 (2016).

- 723 16. Triff, K., *et al.* Genome-wide analysis of the rat colon reveals proximal-distal differences  
724 in histone modifications and proto-oncogene expression. *Physiol Genomics* **45**, 1229-  
725 1243 (2013).
- 726 17. Tan, C.W., Hirokawa, Y., Gardiner, B.S., Smith, D.W. & Burgess, A.W. Colon  
727 cryptogenesis: asymmetric budding. *PLoS One* **8**, e78519 (2013).
- 728 18. Brennan, F.E. & Fuller, P.J. Acute regulation by corticosteroids of channel-inducing  
729 factor gene messenger ribonucleic acid in the distal colon. *Endocrinology* **140**, 1213-  
730 1218 (1999).
- 731 19. Renes, I.B., *et al.* Alterations in Muc2 biosynthesis and secretion during dextran sulfate  
732 sodium-induced colitis. *Am J Physiol Gastrointest Liver Physiol* **282**, G382-389 (2002).
- 733 20. Fleming, R.E., *et al.* Carbonic anhydrase IV expression in rat and human gastrointestinal  
734 tract regional, cellular, and subcellular localization. *J Clin Invest* **96**, 2907-2913 (1995).
- 735 21. Verbrugghe, P., Kujala, P., Waelput, W., Peters, P.J. & Cuvelier, C.A. Clusterin in  
736 human gut-associated lymphoid tissue, tonsils, and adenoids: localization to M cells and  
737 follicular dendritic cells. *Histochem Cell Biol* **129**, 311-320 (2008).
- 738 22. Castro, C.D. & Flajnik, M.F. Putting J chain back on the map: how might its expression  
739 define plasma cell development? *J Immunol* **193**, 3248-3255 (2014).
- 740 23. He, H., *et al.* CCR6(+) B lymphocytes responding to tumor cell-derived CCL20 support  
741 hepatocellular carcinoma progression via enhancing angiogenesis. *Am J Cancer Res* **7**,  
742 1151-1163 (2017).
- 743 24. Suan, D., *et al.* CCR6 Defines Memory B Cell Precursors in Mouse and Human  
744 Germinal Centers, Revealing Light-Zone Location and Predominant Low Antigen Affinity.  
745 *Immunity* **47**, 1142-1153 e1144 (2017).
- 746 25. Savage, A.K., Liang, H.E. & Locksley, R.M. The Development of Steady-State Activation  
747 Hubs between Adult LT $\alpha$  ILC3s and Primed Macrophages in Small Intestine. *J Immunol*  
748 **199**, 1912-1922 (2017).
- 749 26. Reinicke, A.T., *et al.* Ubiquitin C-terminal hydrolase L1 (UCH-L1) loss causes  
750 neurodegeneration by altering protein turnover in the first postnatal weeks. *Proc Natl*  
751 *Acad Sci U S A* **116**, 7963-7972 (2019).
- 752 27. Korsunsky, I., *et al.* Fast, sensitive and accurate integration of single-cell data with  
753 Harmony. *Nat Methods* **16**, 1289-1296 (2019).
- 754 28. Schubert, M., *et al.* Perturbation-response genes reveal signaling footprints in cancer  
755 gene expression. *Nat Commun* **9**, 20 (2018).



- 756 29. Holland, C.H., Szalai, B. & Saez-Rodriguez, J. Transfer of regulatory knowledge from  
757 human to mouse for functional genomics analysis. *Biochim Biophys Acta Gene Regul*  
758 *Mech* **1863**, 194431 (2020).
- 759 30. Furtado, G.C., *et al.* TNFalpha-dependent development of lymphoid tissue in the  
760 absence of RORgammat(+) lymphoid tissue inducer cells. *Mucosal Immunol* **7**, 602-614  
761 (2014).
- 762 31. Hafner, A., Bulyk, M.L., Jambhekar, A. & Lahav, G. The multiple mechanisms that  
763 regulate p53 activity and cell fate. *Nat Rev Mol Cell Biol* **20**, 199-210 (2019).
- 764 32. Fawkner-Corbett, D., *et al.* Spatiotemporal analysis of human intestinal development at  
765 single-cell resolution. *Cell* **184**, 810-826 e823 (2021).
- 766 33. Mebius, R.E. Organogenesis of lymphoid tissues. *Nat Rev Immunol* **3**, 292-303 (2003).
- 767 34. Smillie, C.S., *et al.* Intra- and Inter-cellular Rewiring of the Human Colon during  
768 Ulcerative Colitis. *Cell* **178**, 714-730 e722 (2019).
- 769 35. de Lange, K.M., *et al.* Genome-wide association study implicates immune activation of  
770 multiple integrin genes in inflammatory bowel disease. *Nat Genet* **49**, 256-261 (2017).
- 771 36. Uniken Venema, W.T., Voskuil, M.D., Dijkstra, G., Weersma, R.K. & Festen, E.A. The  
772 genetic background of inflammatory bowel disease: from correlation to causality. *J*  
773 *Pathol* **241**, 146-158 (2017).
- 774 37. Verstockt, B., Smith, K.G. & Lee, J.C. Genome-wide association studies in Crohn's  
775 disease: Past, present and future. *Clin Transl Immunology* **7**, e1001 (2018).
- 776 38. Liu, J.Z. & Anderson, C.A. Genetic studies of Crohn's disease: past, present and future.  
777 *Best Pract Res Clin Gastroenterol* **28**, 373-386 (2014).
- 778 39. Jostins, L., *et al.* Host-microbe interactions have shaped the genetic architecture of  
779 inflammatory bowel disease. *Nature* **491**, 119-124 (2012).
- 780 40. Ayyaz, A., *et al.* Single-cell transcriptomes of the regenerating intestine reveal a revival  
781 stem cell. *Nature* **569**, 121-125 (2019).
- 782 41. Lukonin, I., *et al.* Phenotypic landscape of intestinal organoid regeneration. *Nature* **586**,  
783 275-280 (2020).
- 784 42. Yan, Y., *et al.* Temporal and spatial analysis of clinical and molecular parameters in  
785 dextran sodium sulfate induced colitis. *PLoS One* **4**, e6073 (2009).
- 786 43. Tontini, G.E., Vecchi, M., Pastorelli, L., Neurath, M.F. & Neumann, H. Differential  
787 diagnosis in inflammatory bowel disease colitis: state of the art and future perspectives.  
788 *World J Gastroenterol* **21**, 21-46 (2015).

- 789 44. Troncone, E., Marafini, I., Del Vecchio Blanco, G., Di Grazia, A. & Monteleone, G. Novel  
790 Therapeutic Options for People with Ulcerative Colitis: An Update on Recent  
791 Developments with Janus Kinase (JAK) Inhibitors. *Clin Exp Gastroenterol* **13**, 131-139  
792 (2020).
- 793 45. Huber, C., *et al.* Lymphotoxin-beta receptor-dependent genes in lymph node and  
794 follicular dendritic cell transcriptomes. *J Immunol* **174**, 5526-5536 (2005).
- 795 46. Kim, B., Barnett, J.L., Kleer, C.G. & Appelman, H.D. Endoscopic and histological  
796 patchiness in treated ulcerative colitis. *Am J Gastroenterol* **94**, 3258-3262 (1999).
- 797 47. Arias, M.T., *et al.* A panel to predict long-term outcome of infliximab therapy for patients  
798 with ulcerative colitis. *Clin Gastroenterol Hepatol* **13**, 531-538 (2015).
- 799 48. Barre, A., Colombel, J.F. & Ungaro, R. Review article: predictors of response to  
800 vedolizumab and ustekinumab in inflammatory bowel disease. *Aliment Pharmacol Ther*  
801 **47**, 896-905 (2018).
- 802 49. Brandse, J.F., *et al.* Loss of Infliximab Into Feces Is Associated With Lack of Response  
803 to Therapy in Patients With Severe Ulcerative Colitis. *Gastroenterology* **149**, 350-355  
804 e352 (2015).
- 805

# Figure 1

bioRxiv preprint doi: <https://doi.org/10.1101/2021.07.01.450768>; this version posted July 3, 2021. The copyright holder for this preprint (which was not certified by peer review) is the author/funder, who has granted bioRxiv a license to display the preprint in perpetuity. It is made available under aCC-BY-ND 4.0 International license.

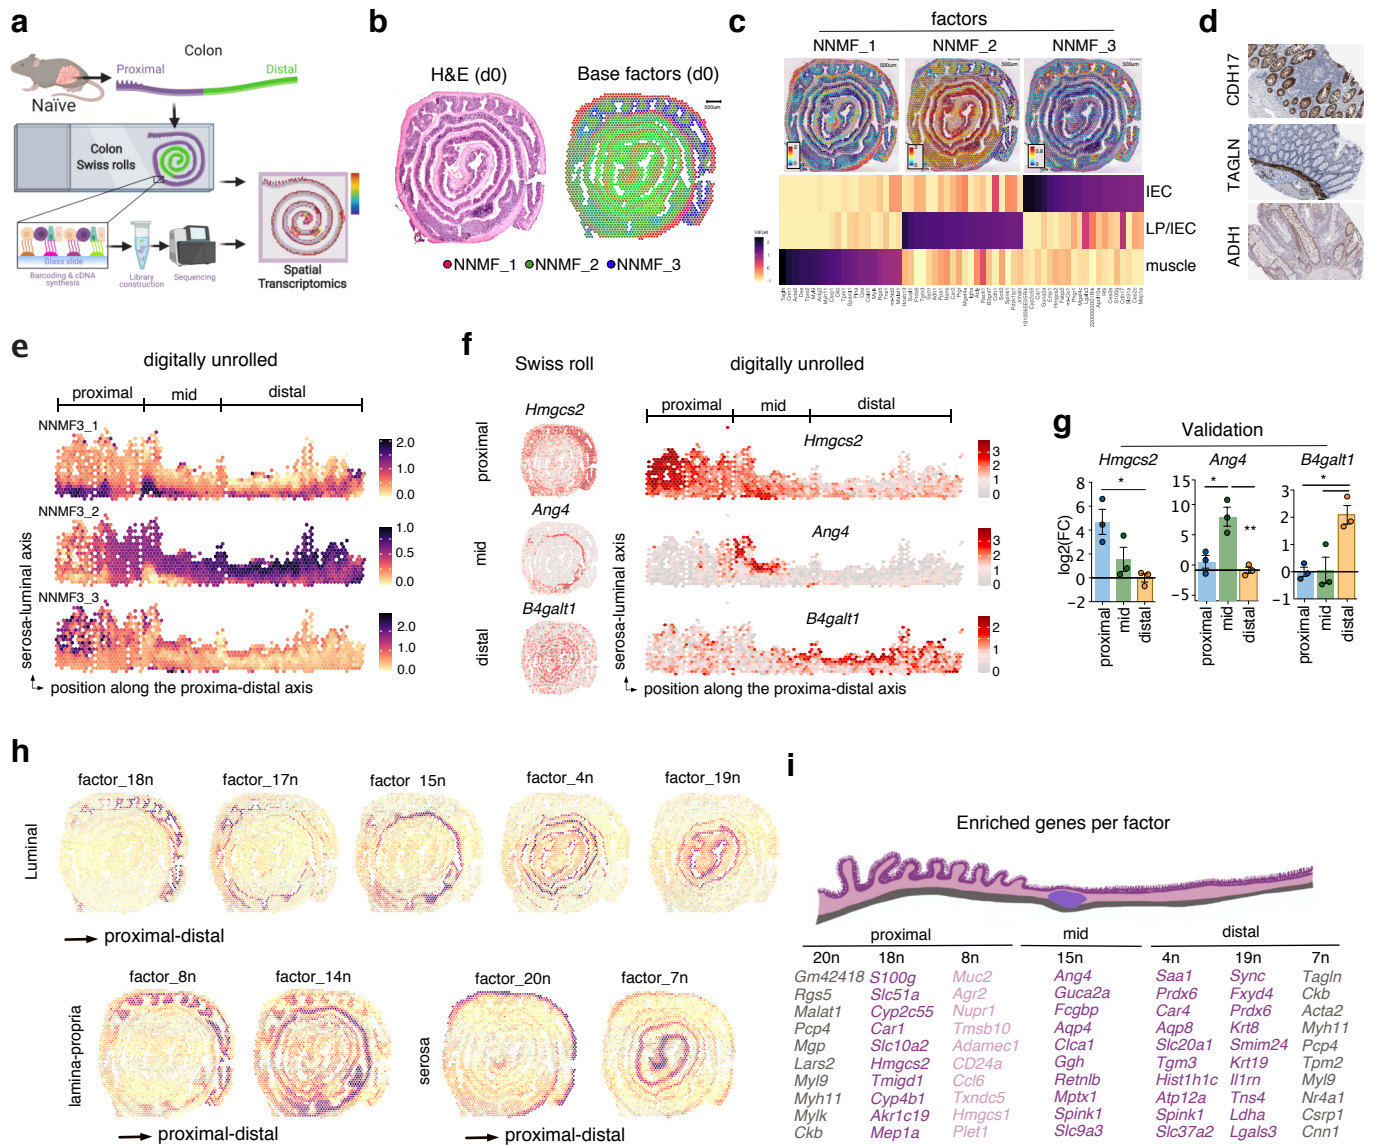

# Figure 2

bioRxiv preprint doi: <https://doi.org/10.1101/2021.07.01.450768>; this version posted July 3, 2021. The copyright holder for this preprint (which was not certified by peer review) is the author/funder, who has granted bioRxiv a license to display the preprint in perpetuity. It is made available under aCC-BY-ND 4.0 International license.

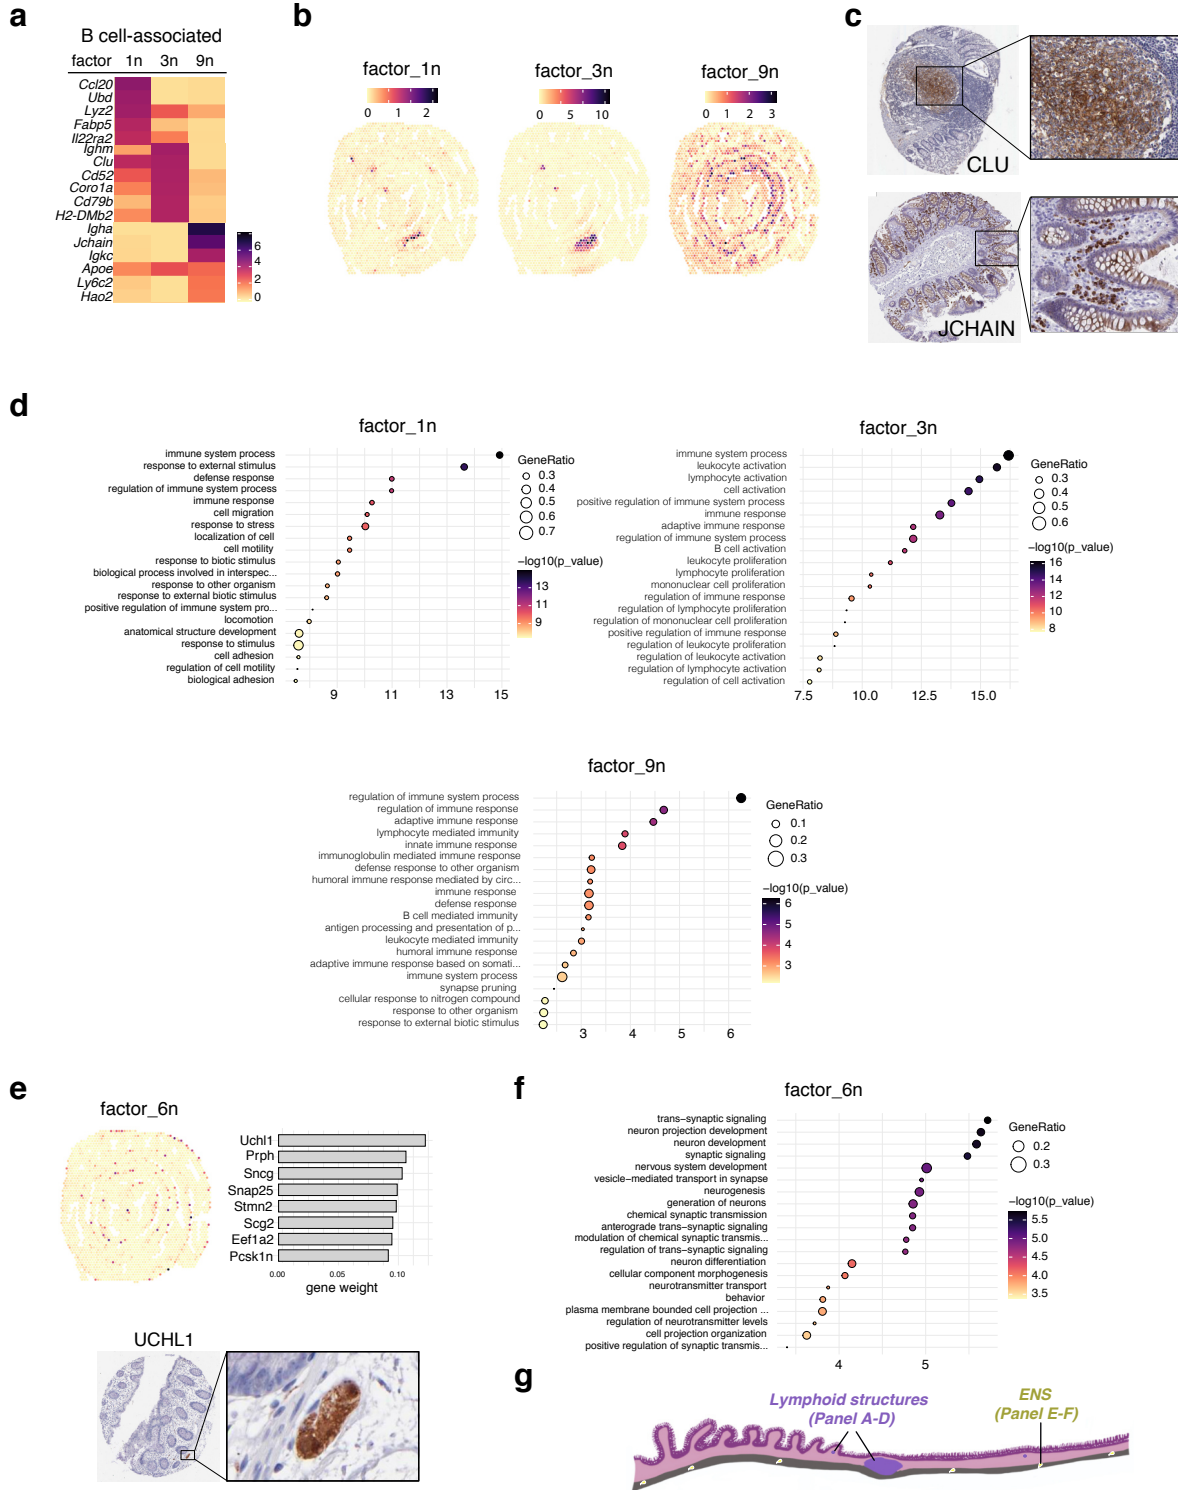

# Figure 3

bioRxiv preprint doi: <https://doi.org/10.1101/2021.07.01.450768>; this version posted July 3, 2021. The copyright holder for this preprint (which was not certified by peer review) is the author/funder, who has granted bioRxiv a license to display the preprint in perpetuity. It is made available under aCC-BY-ND 4.0 International license.

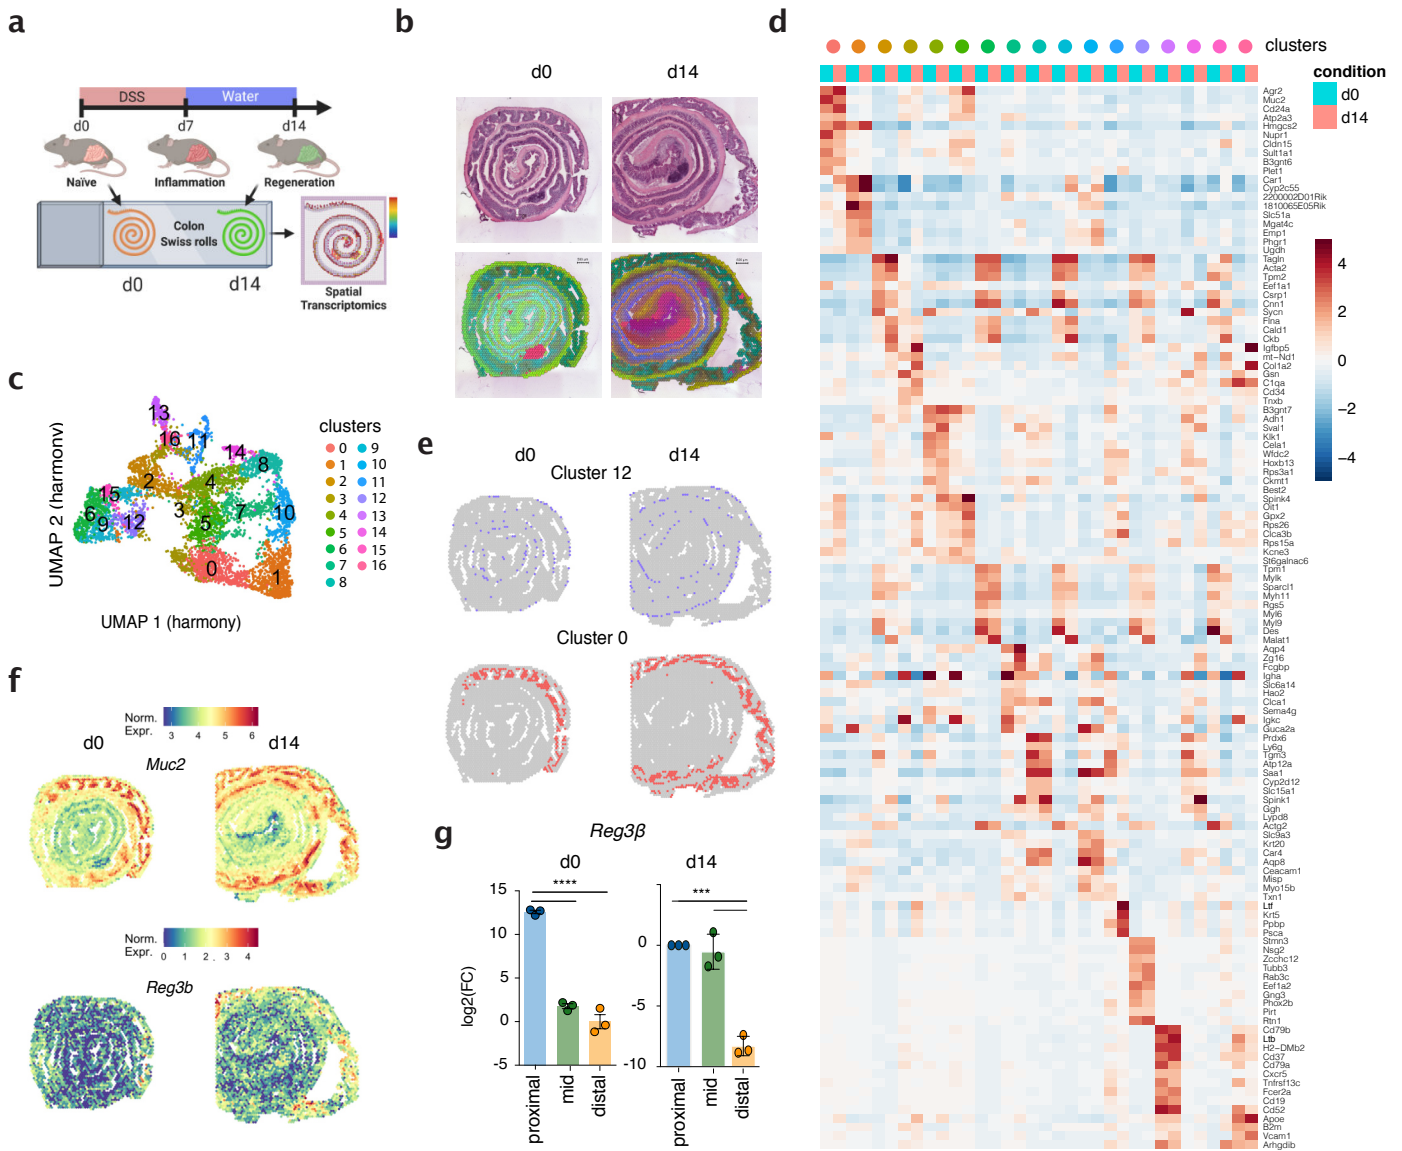

# Figure 4

bioRxiv preprint doi: <https://doi.org/10.1101/2021.07.01.450768>; this version posted July 3, 2021. The copyright holder for this preprint (which was not certified by peer review) is the author/funder, who has granted bioRxiv a license to display the preprint in perpetuity. It is made available under aCC-BY-ND 4.0 International license.

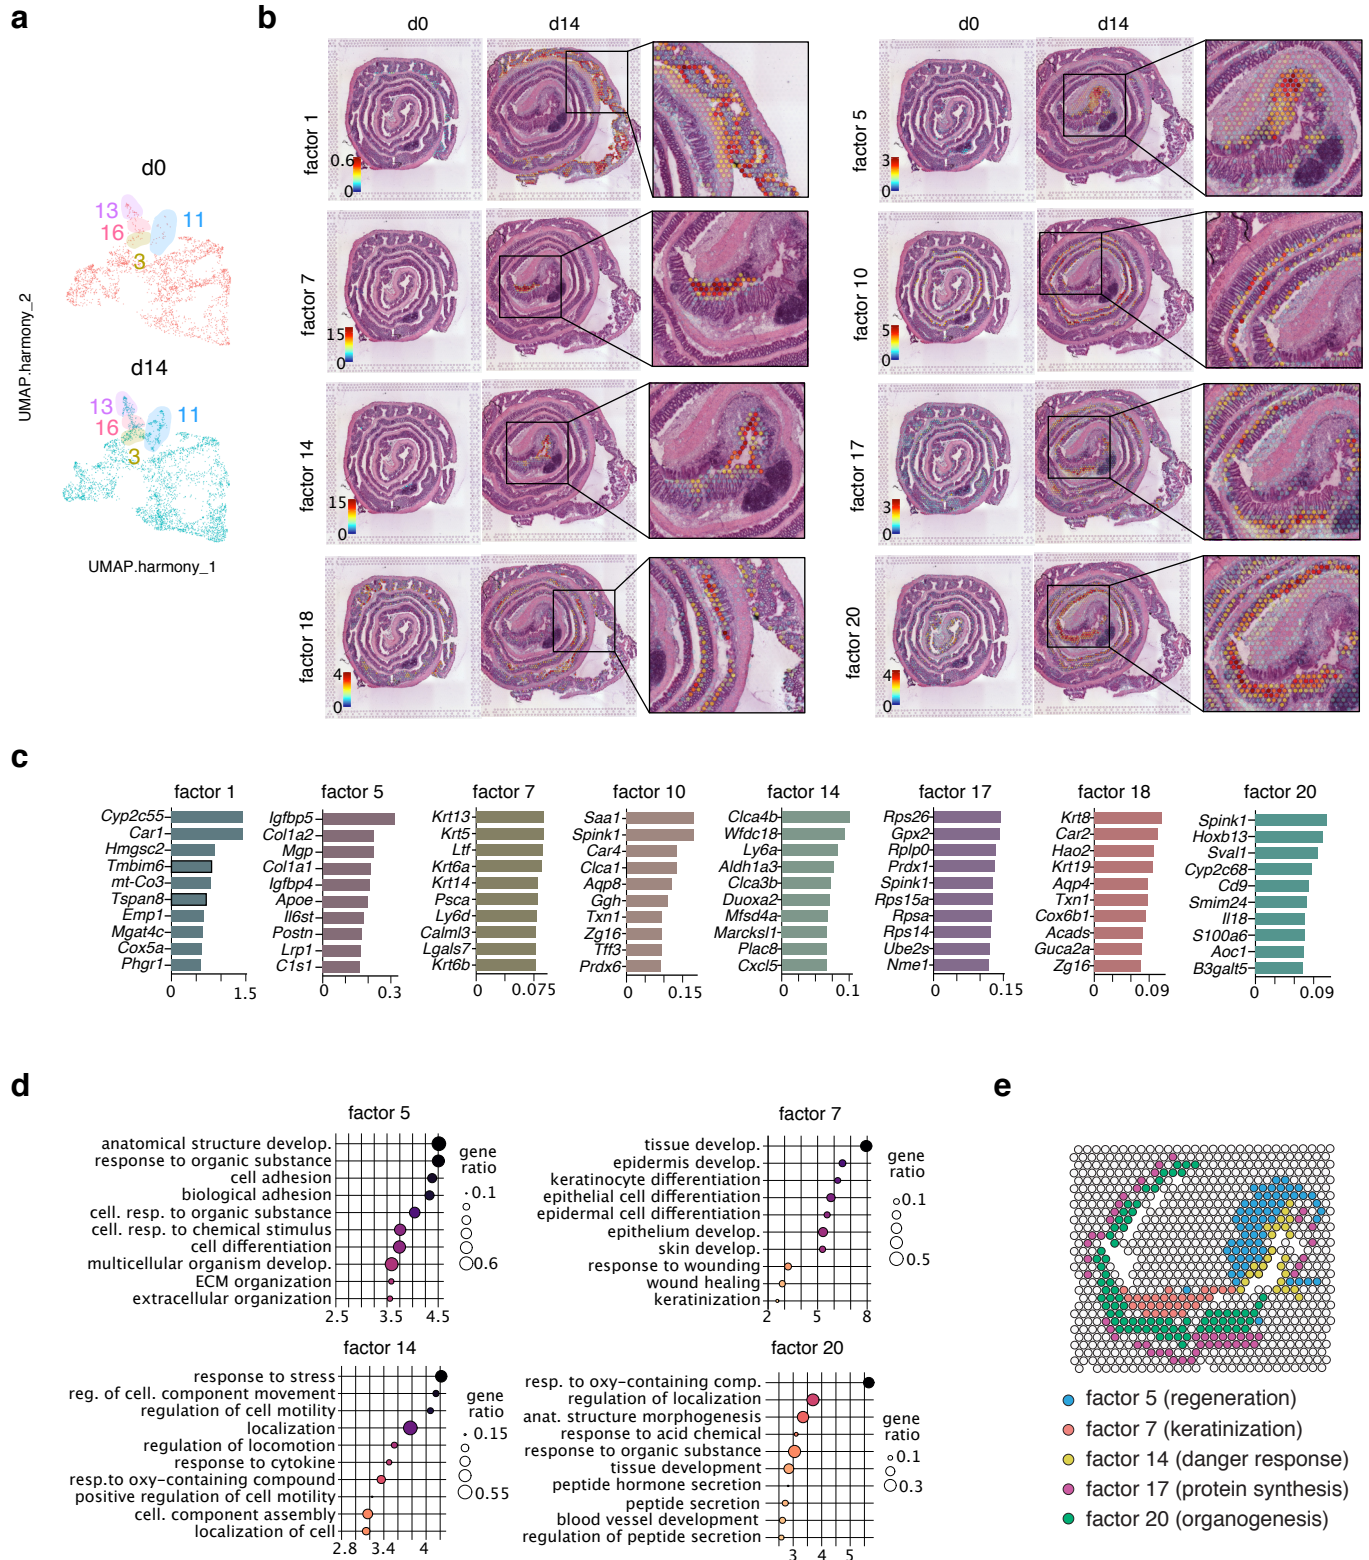

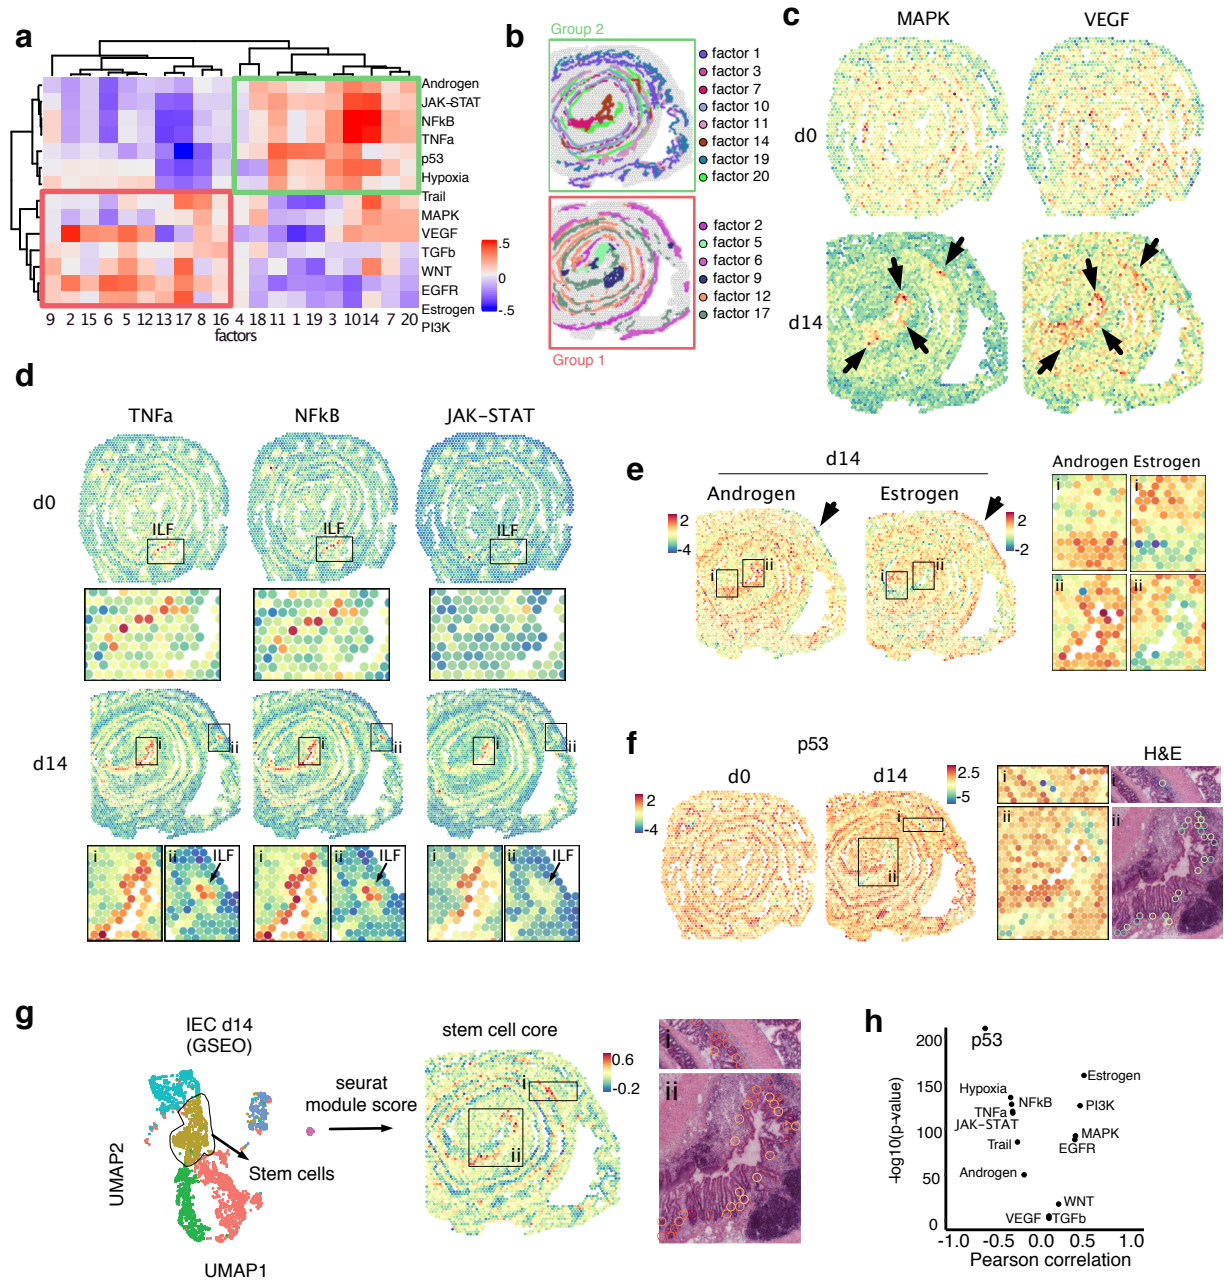

# Figure 6

bioRxiv preprint doi: <https://doi.org/10.1101/2021.07.01.450768>; this version posted July 3, 2021. The copyright holder for this preprint (which was not certified by peer review) is the author/funder, who has granted bioRxiv a license to display the preprint in perpetuity. It is made available under aCC-BY-ND 4.0 International license.

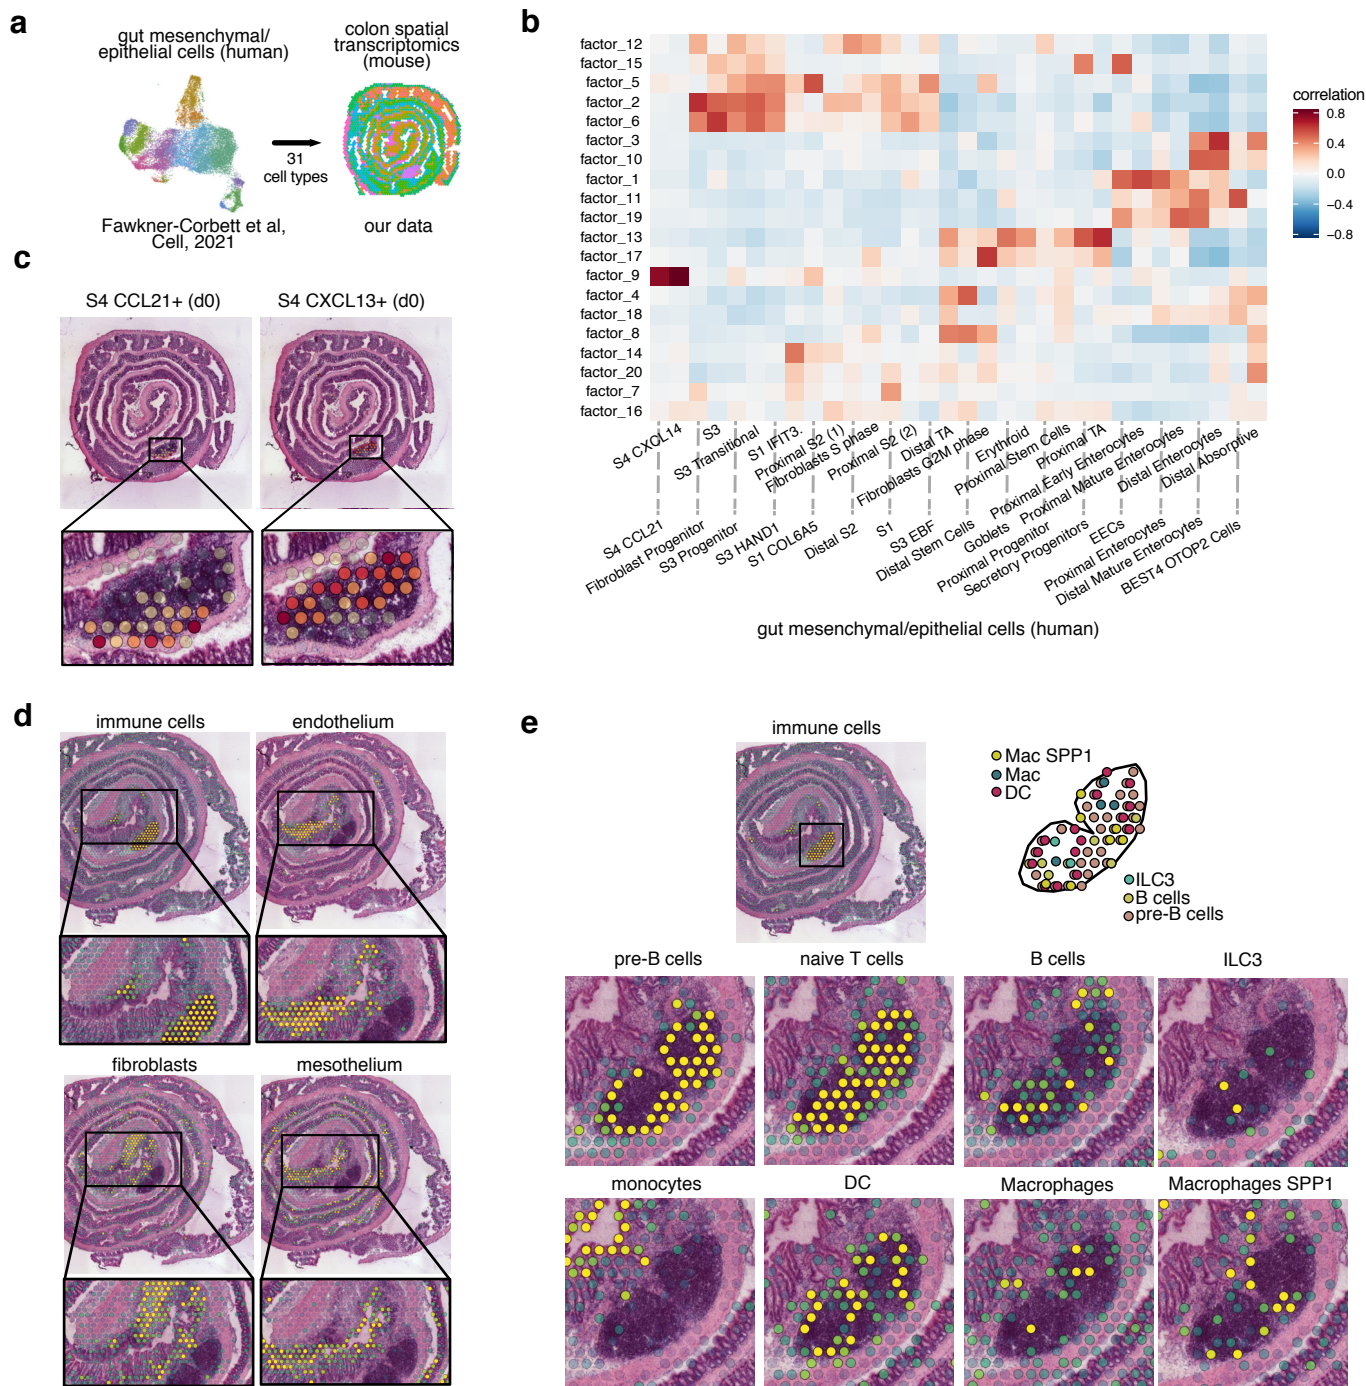



# Figure 7

bioRxiv preprint doi: <https://doi.org/10.1101/2021.07.01.450768>; this version posted July 3, 2021. The copyright holder for this preprint (which was not certified by peer review) is the author/funder, who has granted bioRxiv a license to display the preprint in perpetuity. It is made available under aCC-BY-ND 4.0 International license.

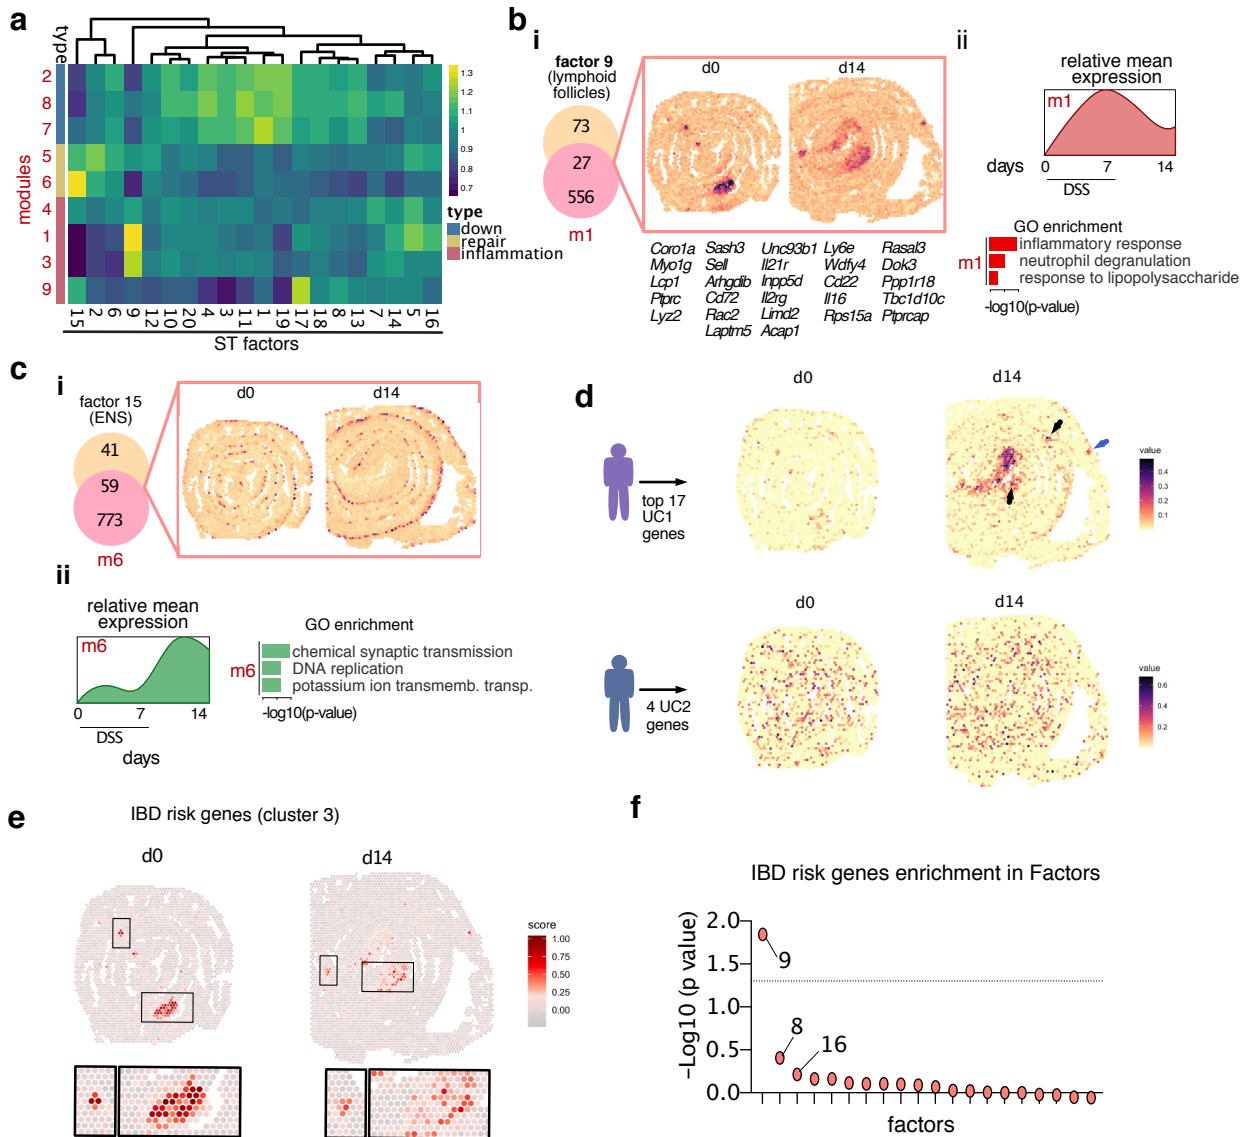

Source: https://www.biorxiv.org/content/biorxiv/early/2021/07/03/2021.07.01.450768.full.pdf
